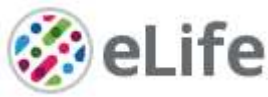

1  
2  
3  
4  
5  
6  
7  
8  
9  
10  
11  
12  
13  
14  
15  
16  
17  
18  
19  
20  
21  
22  
23  
24  
25  
26  
27  
28  
29  
30  
31  
32  
33  
34

# The evolution and structure of snake venom phosphodiesterase (svPDE) highlight its importance in venom actions

Cheng-Tsung Pan<sup>1,2</sup>, Chien-Chu Lin<sup>1</sup>, I-Jin Lin<sup>1</sup>, Kun-Yi Chien<sup>3</sup>, Yeong-Shin Lin<sup>4\*</sup>, Hsiao-Han Chang<sup>1,5,6\*</sup>, Wen-Guey Wu<sup>1,5\*</sup>

<sup>1</sup> Institute of Bioinformatics and Structural Biology, National Tsing Hua University, Hsinchu, Taiwan

<sup>2</sup> Department of Biostatistics, University of Oslo, Oslo, Norway

<sup>3</sup> Graduate Institute of Biomedical Sciences, Department of Biochemistry and Molecular Biology, School of Medicine, Chang Gung University, Taiwan

<sup>4</sup> Institute of Bioinformatics and Systems Biology, National Yang Ming Chiao Tung University, Hsinchu, Taiwan

<sup>5</sup> Department of Life Science, National Tsing Hua University, Hsinchu, Taiwan

<sup>6</sup> Institute of Molecular and Cellular Biology, National Tsing Hua University, Hsinchu, Taiwan

\*Co-corresponding authors: Yeong-Shin Lin, Hsiao-Han Chang, Wen-Guey Wu

**Email:** YSL      yslin@nycu.edu.tw  
          HHC      hhchang@life.nthu.edu.tw  
          WGW      wgwu@life.nthu.edu.tw

**Author Contributions:** CTP conceived and planned the study and analyzed the data. CCL solved the X-ray crystal structures and CCL and IJL performed the biochemical binding experiments. KYC carried out MASS for protein and glycan ID. WGW guided the snake venom project and toxin protein group. HHC and YSL advised the bioinformatics analysis. CTP, CCL and IJL wrote the manuscript. WGW, HHC and YSL provided comments and revised the manuscript. All authors have read and approved this manuscript.

**Classification:** Evolution

**Keywords:** phosphodiesterase, snake venom, alternative splicing, mobile elements, ectonucleotide pyrophosphatase/phosphodiesterase

**This PDF file includes:**

Main Text  
Figures 1 to 3

## 35 **Abstract**

36 For decades, studies of snake venoms focused on the venom-ome-specific toxins (VSTs).  
37 VSTs are dominant soluble proteins believed to contribute to the main venomous effects  
38 and emerged into gene clusters for fast adaptation and diversification of snake venoms.  
39 However, the conserved minor venom components, such as snake venom  
40 phosphodiesterase (svPDE), remain largely unexplored. Here, we focus on svPDE by  
41 genomic and transcriptomic analysis across snake clades and demonstrate that soluble  
42 svPDE is co-opted from the ancestral membrane-attached ENPP3 (ectonucleotide  
43 pyrophosphatase/phosphodiesterase 3) gene by replacing the original 5' exon with the  
44 exon encoding a signal peptide. Notably, the exons, promoters and  
45 transcription/translation starts have been replaced multiple times during snake evolution,  
46 suggesting the evolutionary necessity of svPDE. The structural and biochemical analyses  
47 also show that svPDE shares the similar functions with ENPP family, suggesting its  
48 perturbation to the purinergic signaling and insulin transduction in venomous effects.

## 49 **Significance Statement**

50 We provided a case of the evolutionary co-option strategy in which the secretory svPDE,  
51 one of the minor venom components, is generated from the ancestral membrane-anchored  
52 ENPP3 gene by using an alternative 5' exon. The first exon of the svPDE transcript  
53 encodes a signal peptide instead of the transmembrane domain of the ENPP3. Multiple  
54 replacement events of genomic elements during snake evolution maintain the expression  
55 of the svPDE transcripts, suggesting the crucial function of svPDE. Also, the structures  
56 and biochemical analyses indicate that svPDE reuse the original functions of ENPP3 in the  
57 bitten tissues and may interfere with normal cell signaling. Together, our study reveals the  
58 evolution of svPDE and suggests the importance of minor venom components.

## 59 Main Text

### 60 Introduction

61 Snakebite envenoming is a neglected tropical disease that leads to over 100,000  
62 deaths worldwide annually (Gutierrez et al., 2017) and its mortality may be even higher  
63 than malaria in some regions (Stock, Massougbojji, Alagon, & Chippaux, 2007). For  
64 decades, scientists have been dedicated to discovering the components of snake venoms.  
65 The diversity and species-specificity of snake venoms make the first aid and treatments  
66 difficult for snakebites. Traditionally, the dominant proteins in the venoms have been  
67 identified by proteomic approaches as the major components of venoms. Recent  
68 advances in whole-genome sequencing of venomous snakes have prompted many studies  
69 to consider the origin and diversification of such dominant proteins, which have been  
70 named as the venom-ome-specific toxins (VSTs) (Suryamohan et al., 2020) and have  
71 regarded as the main contributors of toxic effects.

72  
73 Most VSTs have evolved from ancestral genes and been duplicated into large gene  
74 clusters in several snake clades. For example, the gene clusters of snake venom  
75 metalloproteases (SVMP) in Viperidae and three-finger toxins (3FTx) in Elapidae have  
76 been revealed to evolve from the ancestral genes of a membrane-anchored protein  
77 (named ADAM28 in other species) and a membrane GPI-anchored protein (named Ly6 in  
78 other species), respectively (Almeida et al., 2021; Giorgianni et al., 2020; Margres et al.,  
79 2021; Rao et al., 2022). Alternative mRNA splicing at the 3' end has been proposed to  
80 account for the adaptation of encoding ancestral membrane-anchored ADAM28 proteins  
81 into a soluble protein in Viperidae by losing the C-terminal transmembrane domain. This  
82 ancestral gene has evolved into the SVMP gene cluster with venom-specific expression in  
83 Viperidae followed by multiple gene duplication events. (Giorgianni et al., 2020; Ogawa et  
84 al., 2019). Another example is the 3FTx in Elapidae, which may have evolved from the  
85 gene of GPI-anchored Ly6 protein by losing the sequence encoding the peptide  
86 responsible for the attachment to GPI lipids on the membrane (Tsetlin, 2015).

87  
88 Aside from the VSTs mentioned above, the low quantity of minor venom components  
89 hinders researchers from studying them, rendering their biological significance elusive.  
90 One minor venom component, snake venom phosphodiesterase (svPDE), has been found  
91 to be ubiquitous in the venoms of most venomous species in Viperidae (~0.01 – 2.5%)  
92 (Damm, Hempel, & Sussmuth, 2021) and Elapidae (~0.4 – 1.1%) (Laustsen et al., 2015;  
93 C. H. Tan, Tan, Fung, & Tan, 2015). SvPDE is a soluble high-molecular-weight glycoprotein  
94 and is distinct from the intracellular phosphodiesterase (Al-Saleh & Khan, 2011; Mitra &  
95 Bhattacharyya, 2014; Oliveira et al., 2021; L. Peng et al., 2011; Santoro, Vaquero, Paes  
96 Leme, & Serrano, 2009; Trummal et al., 2014; Valerio, Corradini, Panunto, Mello, &  
97 Hyslop, 2002). Since extracellular ATP is involved in epithelial homeostasis (Mori et al.,  
98 2022) and also functions as a danger signal of damaged cells through the purinergic

99 signaling pathway (Burnstock, 2016; Cintra-Francischinelli et al., 2010), svPDE, which  
100 enzymatically acts on the extracellular ATP, is expected to perturb the related physiological  
101 responses. However, the gene encoding svPDE, the evolutionary origin of that gene and  
102 the potential biological targets of svPDE remain largely unknown. In this study, we  
103 integrated comparative genomics, comparative transcriptomics of the venom glands, and  
104 the biochemical analysis of svPDE obtained directly from the venom, to investigate the  
105 genomic locus, gene structure, evolution, protein structure, enzymatic activities and  
106 potential targets of svPDE from *Naja atra*.

## 107 Results

### 108 The evolution of the soluble secretory svPDE from the membrane-anchored ENPP3 109 via alternative splicing of their encoding genes

110 The presence of svPDE in venoms has been identified by proteomics or by detecting  
111 its enzymatic activity for decades. However, its gene characteristics have not been well  
112 reported. To reveal the genomic locus and the gene structure of svPDE, we integrated  
113 genomic, transcriptomic and proteomic data. The query peptide sequence of svPDE was  
114 retrieved from PDB database (accession: 5GZ4). This svPDE was directly purified from the  
115 crude venom of *Naja atra* captured in Taiwan. The target genomes included the draft one  
116 of *Naja atra* from our ongoing internal project and the complete one of its sister species,  
117 *Naja naja* (Suryamohan et al., 2020). For genomes of *Naja atra* and *Naja naja*, the only  
118 genomic hit of the svPDE peptide sequence is located on the ENPP3 locus inferred from  
119 the conserved synteny, while the peptide sequence is a subsequence of the translated  
120 sequence inferred from the putative exons of the ENPP3 gene (**SI Appendix, Fig. S1**).  
121 Consistently, compared with the ENPP3 peptide sequence, the purified svPDE is shorter  
122 at the N-terminal, lacking the cytoplasmic (CP) and transmembrane (TM) domains of  
123 ENPP3 (**SI Appendix, Fig. S1**). The unique genomic hit, conserved synteny, and identical  
124 amino acid sequences strongly suggest that svPDE and ENPP3 are encoded from the  
125 same genomic locus and share all but the 5' end exons.

126  
127 The absence of CP and TM domains in purified svPDE protein is consistent with the  
128 secretory feature of most venom proteins (**Fig. 1A** and **SI Appendix, Fig. S1**). However,  
129 as the ENPP3 gene is highly conserved in the entire Metazoan clades (**SI Appendix, Fig.**  
130 **S2**) and is essential for the basic biochemical functions (Borza, Salgado-Polo, Moolenaar,  
131 & Perrakis, 2021), instead of replacing original ENPP3 by svPDE, their transcripts are  
132 expected to coexist in snakes. One possibility for their coexistence is through an  
133 alternative splicing mechanism (Sorek, 2007; Verta & Jacobs, 2022), in which alternative 5'  
134 exons with a signal peptide emerged, leading to the soluble secretory form without  
135 damaging the functions of the remaining peptides. To test our hypothesis, we  
136 comprehensively *de novo* assembled transcriptomes from the species across 13 clades of  
137 Toxicofera (**Fig. 1B**) with publicly available RNA-Seq data and compared them with the



138 corresponding genomes available in the NCBI Assembly database (**SI Appendix, Table**  
139 **S1**). In addition to the transcript encoding the conserved ENPP3 protein, we found  
140 potential svPDE transcripts comprising all but the first (E1) exons of the ENPP3 gene.

141

142 A careful comparison reveals two types of novel clade-specific E1 of svPDE  
143 transcripts (**Fig. 1B** and **SI Appendix, Fig. S3**). The first one, named svPDE-E1a, found in  
144 the transcriptomes of all snake clades but Elapidae and Hydrophiidae; and the other,  
145 named svPDE-E1b, found only in Elapidae and Hydrophiidae. Both svPDE-E1a and  
146 svPDE-E1b accompany a putative TATA-box core promoter located on their proximal  
147 upstream (**Fig. 1A** and **SI Appendix, Fig. S4**) and encode signal peptides necessary for  
148 the secretory feature of svPDE (**Fig. 1C** and **SI Appendix, Fig. S3**). In addition, the  
149 canonical GT-AG introns between the novel E1 (for both two types) and the conserved E2  
150 were consistently observed in all snake species with available genomes. Together, our  
151 results suggest that the svPDE protein came from the co-option of the ancestral ENPP3  
152 gene by using a novel 5' exon.

### 153 **The recruitment of svPDE**

154 We next traced the origin of the novel E1 in Toxicofera by examining transcriptomic  
155 and genomic data. We found that the genomic sequences of svPDE-E1a were present and  
156 conserved in all species of Serpentes (including Elapidae and Hydrophiidae, in which the  
157 expressed transcripts do not consist of svPDE-E1a) but not in the species of Dactyloidae,  
158 Agamidae, Varanidae, and Typhlopidae. This suggests an early emergence of svPDE-E1a  
159 in the common ancestor of Serpentes and became non-functional in some descent  
160 lineages (i.e., not expressed in Pythonidae, Elapidae and Hydrophiidae) (**Fig. 1B**).  
161 Pythonidae has genomic mutations in the TATA-box of svPDE-E1a (**Fig. 1C** and **SI**  
162 **Appendix, Fig. S4A**) and the absence of an alternative mechanism to express svPDE is  
163 probably associated with its non-venomous character (Reyes-Velasco et al., 2015). For  
164 svPDE-E1a in some species of Dipsadidae and Lamprophiidae, although their original  
165 translation start codons (ATG) had mutated, alternative ATGs were recruited at the  
166 downstream region of the original ones (**Fig. 1C** and **SI Appendix, Fig. S4B**). This  
167 recruitment of start codons was caused by a newly 3' splicing site of svPDE-E1a emerged  
168 in their common ancestor (**SI Appendix, Fig. S5**) that elongates the length of svPDE-E1a  
169 at the 3' end. This replacement allows for the possibility of svPDE translation in Dipsadidae  
170 and Lamprophiidae.

171

172 Similar replacements of elements involved in svPDE expression were also found in  
173 Elapidae and Hydrophiidae: the emergence of exon svPDE-E1b. Although svPDE-E1a is  
174 highly conserved in the genomes of Elapidae and Hydrophiidae, it was not found in their  
175 transcriptomes, potentially due to the genomic mutation of a TATA-box at the putative core  
176 promoter for svPDE-E1a in their common ancestor (**Fig. 1C** and **SI Appendix, Fig. S4A**).  
177 Instead, their svPDE transcripts include another 5' exon, svPDE-E1b, which was not

178 identified in the genomes of other clades that diverged earlier. These results indicate that  
179 svPDE transcripts switched from using svPDE-E1a to svPDE-E1b in the common ancestor  
180 of Elapidae and Hydrophiidae (**Fig. 1C**).

181

182 Notably, the entire svPDE-E1b, including its putative promoter, is embedded in the  
183 antisense strand of an uncharacterized Elapidae mobile element (Dfam accession:  
184 DR0148352, **SI Appendix, Fig. S4C**) that inserted into the ENPP3 locus in the common  
185 ancestor of Elapidae and Hydrophiidae (**Fig. 1C**). We examined other DR0148352  
186 elements in the genome-available species of Elapidae and Hydrophiidae and found that  
187 the homologous promoter region in the elements do not contain TATA-box patterns or  
188 other promoter-related domains (**SI Appendix, Fig. S4C**). This suggests that the putative  
189 promoter of svPDE-E1b emerged *in situ* after the mobile element insertion. Interestingly,  
190 the efficiency of svPDE expression could be associated with the TATA-box of svPDE-1b  
191 since Elapidae and Hydrophiidae express significantly high and low levels of svPDE (**Fig.**  
192 **2A**) in line with the canonical and non-canonical TATA-box patterns (**SI Appendix, Fig.**  
193 **S4C**), respectively.

#### 194 **SvPDE are predominantly expressed in the venom glands of venomous snakes**

195 We then compared the svPDE expression in venom glands among different snake  
196 clades using transcriptomic data. As the sequences of svPDE and ENPP3 only differ in the  
197 first exon, the reads mapped to the shared exons cannot be distinguished from different  
198 transcripts. Thus, we estimated the relative expression of svPDE over ENPP3 by the  
199 difference in the number of reads spanning distinct E1-E2 junctions of ENPP3 and svPDE  
200 splicing forms. This method also reduced the potential biases caused by different  
201 experiments, independent samples, the uncertainty of 5' UTR length due to library  
202 preparation, and the uneven distribution of mapped reads.

203

204 As shown in **Fig. 2A**, for the relative differences of svPDE over ENPP3 expression,  
205 most species of Viperidae, Lamprophiidae and Elapidae exhibit a predominance of svPDE  
206 in their venom glands, in line with the current understanding of venoms by proteomic  
207 studies in such clades (Damm, Hempel, Nalbantsoy, & Sussmuth, 2018; Gren et al.,  
208 2019). The relative expression of svPDE was inferior to ENPP3 in the glands of  
209 Homalopsidae, Colubridae, Dipsadidae and Hydrophiidae (**Fig. 2A**). Intriguingly, compared  
210 to the deficient expression in the other three clades, the expression of svPDE in  
211 Homalopsidae was higher, although not larger than ENPP3. This feature provides new  
212 insight into the characteristics of Homalopsidae, a species still being discovered  
213 (Bernstein, Murphy, Voris, Brown, & Ruane, 2021; Kohler et al., 2021). In contrast to the  
214 predominance of svPDE across the species of Viperidae, the svPDE expression across  
215 the species of Elapidae shows higher interspecies variation and even exhibits a contrary  
216 pattern in some of the species (**Fig. 2A**). Proteomic studies have identified this variation in  
217 Elapidae for decades (Modahl, Roointan, Rogers, Currier, & Mackessy, 2020; N. H. Tan &

218 Tan, 1988), but it still requires future functional studies of svPDE in the venoms to  
219 understand the significance of this variation.

## 220 **The tissue-specific expression of svPDE**

221 Traditionally, svPDE studies have only focused on the venom gland by detecting its  
222 enzyme activity and neglected the expression in other tissues. We identified the difference  
223 between svPDE and ENPP3 transcripts. The reads originated from two transcripts which  
224 became distinguishable in the transcriptomic data. We investigated the relative expression  
225 of svPDE over ENPP3 in other tissues to understand their tissue-specificity and whether  
226 they are mutually exclusive. In both Elapidae (**Fig. 2B**), and Viperidae (**Fig. 2C-D**), taking  
227 India cobra (*Naja naja*), habu (*Protobothrops flavoviridis*) and prairie rattlesnake (*Crotalus*  
228 *viridis*) as examples, venom glands exhibit excessively high svPDE levels and very low  
229 ENPP3 expression. On the other hand, ENPP3 is primarily abundant in small intestines,  
230 and for those tissues enriched with ENPP3, the frequency of svPDE transcripts is low or  
231 nonexistent. These results indicate the mutually exclusive relationship between svPDE  
232 and ENPP3. Interestingly, besides the venom gland, prairie rattlesnakes show a  
233 predominant expression of svPDE in the kidney (**Fig. 2D**).

## 234 **The structure of svPDE and its binding targets**

235 Even though the presence of phosphodiesterase enzymatic activities against ATP,  
236 ADP and/or DNA have been demonstrated in many crude venoms, the exact structural  
237 element responsible for such activities is still unclear. We therefore purified the svPDE  
238 directly from the crude venom of Taiwan cobra (*Naja atra*) via chromatography (**SI**  
239 **Appendix, Fig. S6**) and determined its 3D structure with X-ray crystallography. The  
240 structures of unliganded svPDE (apo form, PDB accession: 5GZ4) and liganded svPDE  
241 (AMP-complexed form, PDB accession: 5GZ5) were determined at resolutions of 2.55 and  
242 2.09 Å (**SI Appendix, Table S2**), respectively. Crystal structures show that svPDE  
243 resembles human ENPP3 and ENPP1 proteins (the structural homologs with currently  
244 available structural data) with *N*-terminal somatomedin domains (SMB1 and SMB2), a  
245 catalytic phosphodiesterase domain (PDE) and a C-terminal nuclease domain (NUC) (**Fig.**  
246 **3A** and **Fig. 3B**). An insertion loop (IL) and two catalytical zinc ions constitute the bimetallic  
247 active site of the catalytic PDE domain (**Fig. 3C**). AMP is accommodated in a nucleotide-  
248 binding pocket formed by residues W251/E255/Y269 from the IL loop and residues  
249 F186/K271 from the catalytic PDE domain (**Fig. 3C** and **Fig. 3D**), where T185 is the  
250 nucleophile residue responsible for the enzymatic activity. The conformation of the active  
251 site in the apo form is almost identical to that in the AMP-complexed form. When AMP is  
252 bound to svPDE, only side chains of N206 and K271 shift and interact with the O atom of  
253 the phosphate group and the N6 atom of AMP, respectively (**Fig. 3C**).

254  
255 Biochemical measurements of the substrate specificity revealed that svPDE could  
256 hydrolyze ATP, ADP and NAD (nicotinamide adenine dinucleotide) with relatively low  $K_m$

257 compared to the hydrolysis of GTP, CTP and UTP (**SI Appendix, Table S3**), indicating that  
258 svPDE is a more effective catalyst for adenine-containing nucleotides. Given that the 3D  
259 structure and substrates are conserved for both svPDE and ENPP3, svPDE could  
260 hydrolyze extracellular nucleotides, showing the preference for adenine nucleotides and  
261 derivatives. Partial electron densities of N-glycans show that seven residues of svPDE  
262 have been post-translationally modified (**Fig. 3E and SI Appendix, Fig. S7**). N512, one of  
263 the seven N-glycans, and C408-C795 disulfide linkage are essential for the stabilization of  
264 the PDE-NUC interface of ENPP members and were found to be conserved in svPDE.

265 Apart from the enzymatic activities, membrane-attached human ENPP1 has been  
266 shown to be able to inhibit insulin receptor (IR) signaling processes (Kato et al., 2012), and  
267 membrane-attached human ENPP3 plays a functional role in the Golgi apparatus of  
268 neuronal cells to suppress the activity of 1,6-N-acetylglucosaminyltransferase, GnT-IX  
269 (Korekane et al., 2013) and perturbed N-glycosylation functions. Interestingly, mass  
270 spectrometric analysis of the N-glycosylation patterns with less terminal sialic acid  
271 contrasts sharply with our previous study on venom glycoproteins such as SVMP (Huang  
272 et al., 2015). Without terminal sialic acids, the exposed lactose disaccharide domain of the  
273 N-glycan moiety in svPDE enables its binding to immunologically important galectins. As  
274 shown in **Fig. 3F** and **Fig. 3G**, svPDE indeed interacts with IR ectodomain and Gal-3 with  
275 apparent binding affinities  $K_D \sim 1.8 \mu\text{M}$  and  $\sim 269 \mu\text{M}$ , respectively. A recent study reported  
276 that direct binding of Gal-3 to insulin receptors triggers the disease state of mice  
277 adipocytes (P. Li et al., 2016). Hence, it would be interesting to investigate how svPDE  
278 might interact with IR and Gal-3 and get involved in the tissue damage and enhancement  
279 of cell toxicity resulting from VSTs, such as 3FTx and cytotoxins, in cobra snakebites.

## 280 Discussion

281 Since ENPP3 is shared among Metazoan species, but svPDE is limited to snakes (**SI**  
282 **Appendix, Fig. S2**), our result suggests that svPDE has evolved from an ancestral  
283 ENPP3 gene by co-option, an evolutionary strategy of using pre-existing proteins for new  
284 functions. This type of co-option was also used for other minor venom components of 5'  
285 nucleotidase (5NT), as shown in a recent study on the *Bothrops jararaca* genome  
286 (Almeida et al., 2021). By using an alternative 5' exon, ENPP3 replaced its domains for  
287 membrane attachment by the signal peptide and became a secretory svPDE protein. The  
288 mechanism of svPDE expression has changed multiple times during snake evolution, and  
289 the one that emerged in the common ancestor of Elapidae and Hydrophiidae was  
290 associated with an insertion of mobile elements (**Fig. 1C**). New genes evolving from the  
291 insertion of mobile elements have been found in various species, such as the genes that  
292 arose through L1 and Alu insertion in primates (Long, 2001). Based on the transcriptomic  
293 data, this mobile element is still active and the genomic changes caused by its insertion  
294 may still be happening in the extant species. Such expansion of mobile elements has been

295 observed and proposed to contribute to the adaptation of Hydrophiidae recently (C. Peng  
296 et al., 2020).

297

298 Notably, the replacement of regulatory elements that evolved multiple times during  
299 snake evolution strongly suggests the importance of keeping or improving the expression  
300 of svPDE in the mechanism of venom action. Nevertheless, different replacements of  
301 exons and regulatory elements that emerged in Viperidae and Elapidae clades could  
302 support and be probably associated with the idea that the fangs of these two clades have  
303 evolved independently (Westeen, Durso, Grundler, Rabosky, & Davis Rabosky, 2020).

304 It should be noted that seven ENPP family members have merged and duplicated into  
305 eight copies (two ENPP7 copies) in the ancestor of Gnathostomata, i.e., before the  
306 divergence of Acanthodians (cartilaginous fishes) and Euteleostomi (the common ancestor  
307 of other bony vertebrates), and then followed by a loss of ENPP5 in the snake lineage (**SI**  
308 **Appendix, Fig. S2**). Since snake genomes contain seven ENPP copies (except for the  
309 loss of ENPP5) sharing the conserved PDE domain, all copies may be reported as the  
310 targets while using svPDE peptide as a query against the genomes and thus may cause  
311 the overestimation of svPDE gene copies in other studies (Rao et al., 2022).

312

313 Comparative transcriptomics is a powerful tool to reveal species-specific or tissue-  
314 specific novel transcripts. For example, the expression of svPDE in the less-known  
315 Lamprophiidae, which has not been reported, is probably associated with the adaptation of  
316 prey selection as a dietary generalist compared to Viperidae and Elapidae (Portillo et al.,  
317 2019). In addition, although the svPDE transcripts are rare in the glands of Colubridae,  
318 Dipsadidae, and Hydrophiidae, the junction spanning reads and/or *de novo* assembled  
319 transcripts indicate their existence in such clades. Although low, the svPDE expression in  
320 Duvernoy's glands of Colubridae is intriguing as Colubridae is traditionally regarded as a  
321 non-venomous clade. Furthermore, as Duvernoy's glands seem to be a replacement for  
322 the venom gland from the perspectives of evolution and anatomy, its svPDE expression  
323 might imply some unknown function of Duvernoy's glands in Colubridae. Similar questions  
324 are also worthy to be addressed for the rictal glands of pythons, which are believed to be a  
325 relic of the secretion system used by ancestral snakes. Furthermore, the predominance of  
326 svPDE in prairie rattlesnakes' kidneys (**Fig. 2D**) was only found in males, suggesting an  
327 unknown physiological role of svPDE in the kidneys of male vipers. It would be interesting  
328 to further explore this sexual bias when more data becomes available from different  
329 species and individuals.

330

331 Based on our biochemical analysis, similar to ENPP3, svPDE can hydrolyze a variety  
332 of substrates, including nucleotides and nucleotide derivatives that can induce multiple  
333 cellular effects on the venom-exposed tissues. ENPP3 has been reported to downregulate  
334 extracellular ATP secreted from basophils and mast cells and to suppress allergic



335 inflammation (Tsai et al., 2015), raising a question of what function has adopted from  
336 membrane-attached ENPP3 to secretory svPDE. In the cases of venomous snakebites,  
337 extracellular ATP released by damaged cells can activate complex physiological  
338 responses, such as platelet aggregation, mast cell secretion, inflammation, membrane  
339 permeability, vascular function and neurotransmission (Gordon, 1986), and can associate  
340 with purinergic receptors as a danger signal to initiate immune responses. Another  
341 nucleotide metabolite, NAD, is also believed to activate purinergic receptors to alert the  
342 immune system if released to the extracellular matrix (Audrito, Messina, Brandimarte, &  
343 Deaglio, 2021; Haag et al., 2007). Together, it is conceivable that the removal of  
344 extracellular ATP and NAD by svPDE alters the purinergic signaling of cells around the  
345 bitten tissues and redirects the immune defense mechanism of the prey in responding to  
346 venom actions.

347

348 Despite the catalytic functions of svPDE, we also demonstrated that svPDE is capable  
349 of binding to the IR and Gal-3, suggesting a novel physiological role for svPDE. Previous  
350 studies have revealed that ENPP1 directly interacts with IR and inhibits insulin signaling  
351 (Kato et al., 2012; Maddux & Goldfine, 2000), and the binding of Gal-3 to IR causes insulin  
352 resistance (P. P. Li et al., 2016). In similar fashion, the binding of svPDE to the insulin  
353 receptor and Gal-3 may result in the perturbation of insulin signaling. Although snakebite  
354 symptoms ascribed to the insulin insensitivity and impaired glucose metabolism need to be  
355 further investigated, the versatile role of svPDE in cellular metabolism and immune  
356 modulation draws attention to the different aspects of venom action.

357

358 The co-opted secretory svPDE in snake venom likely evolved to reuse the original  
359 intracellular functions of ENPP3 at the extracellular matrix of snakebite wounds. We  
360 speculated that, around the damaged tissues, svPDE interferes with the normal cellular  
361 physiology in which ENPP family are involved. Although the exact functions and  
362 physiological significance of svPDE are still unclear, it reveals that even as a minor venom  
363 component, it may play a much more complicated role in toxicity by perturbing signal  
364 transduction that was neglected before. In the light of the ubiquitous presence of svPDE in  
365 most, if not all, snake venoms, the highly conserved svPDE is a candidate target in  
366 developing a generic antidote for venomous snakebites across different species clades. In  
367 contrast to the current emergency room treatment for snakebites that relies only on anti-  
368 snake venom serums, the generic drug would significantly reduce the burden of  
369 snakebites on human health.

## 370 **Materials and Methods**

### 371 **Whole-genome assembly of *Naja atra* habitated in Taiwan**

372 DNA was extracted from the muscle tissue of *Naja atra* by using AllPure Genomic DNA  
373 Extraction Kit (AllBio Inc, Taiwan). Third-generation sequencing was obtained by using the



374 circular consensus sequencing (CCS) mode on the PacBio Sequel II System resulting in  
375 4563622 HiFi pass reads (56.8 Gb with an average length of 12.4 Kb). Next-generation  
376 sequencing was obtained in PE150 on the Illumina NovaSeq 6000 System and pre-  
377 processed by fastp (version 0.19.4) (S. Chen, Zhou, Chen, & Gu, 2018) to discard reads  
378 with ambiguous N and trim five nucleotides on the both ends of read, resulting in  
379 559566268 clean paired-reads (~78Gb). PacBio HiFi filtered reads were used for genome  
380 assembly by hifiasm (version 0.13-r308) (Cheng, Concepcion, Feng, Zhang, & Li, 2021),  
381 resulting in a draft genome in a size of 1.88Gb and N50 of 29.7Mb). Assembled contigs  
382 were then polished by Nextpolish (version 1.3.1) (Hu, Fan, Sun, & Liu, 2020) with Illumina  
383 clean paired-reads. See **SI Appendix, Tables S4, S5 and S6** for detailed statistics.

### 384 **Revealing the ENPP3 genomic exons**

385 The ENPP3 exons were identified in the species with available genomes by an iterative  
386 search strategy (Pan & Lin, 2020) with HMMER (version 3.2.1) (Wheeler & Eddy, 2013).  
387 Once the hit was found in a species, its sequence was used to update the HMM profile; as  
388 the sequences from more species were involved in a profile, it could more sensitively  
389 identify the homologs in distant species. The identified exons were scrutinized for the  
390 splicing junctions and cross-checked by aligning with *de novo* assembled transcripts.

### 391 **Identification of svPDE and ENPP3 transcripts**

392 Publicly available RNA-Seq reads were processed for quality and adapter trimming by  
393 using fastp (version 0.21.0) (S. Chen et al., 2018) and then *de novo* assembled to  
394 reconstruct the transcriptome using Trinity (version 2.13.2) (Grabherr et al., 2011). The  
395 potential svPDE transcript was selected by removing the contigs that well-aligned to the  
396 concatenated joined sequence of conserved ENPP3 exons. Fragmented contigs aligned  
397 as substrings were excluded by the consideration that they are assembled with  
398 sequencing error reads resulting in failure of extension. Since the precise position of the  
399 transcription start site is undeterminable due to the nature of poly-A based library  
400 preparation, the longest transcript at the 5' end was used for positioning the genomic  
401 upstream region of promoter prediction.

### 402 **Prediction of promoters and mobile elements**

403 Transmembrane domain and signal peptide were predicted by TMHMM (version 2.0) (Y.  
404 Chen, Yu, Luo, & Jiang, 2003) and SignalP (version 5.0) (Almagro Armenteros et al.,  
405 2019), respectively. The genomic upstream of the transcripts was fetched for searching  
406 promoters. The core promoter was predicted by ElemeNT (Sloutskin et al., 2015) (version  
407 2). The mobile element DR0148352 was recognized by the exceeding multiple hits of such  
408 region in the genomes during the iterative search strategy for exons and annotated by  
409 searching the Dfam database (release 3.5) (Storer, Hubley, Rosen, Wheeler, & Smit,  
410 2021).

### 411 **Estimation of svPDE and ENPP3 expressions**

412 The counting of E1-E2 junction spanning reads was conducted instead of the typical  
413 mapping approach because ENPP3 and svPDE transcripts share long identical sequences  
414 (24 exons), from which the original transcripts of reads cannot be distinguished.  
415 Meanwhile, the imprecise end of 5' UTR during sequencing might influence the unfair  
416 mapping of the first exon across samples. Thus, the expression level of svPDE and  
417 ENPP3 transcripts was estimated by directly counting the reads spanning at least 30 bp  
418 (i.e., 15 bp in each exon) at the exon-exon junctions between specific E1 (ENPP3-E1,  
419 svPDE-E1a and svPDE-E1b) and shared E2. In order to avoid the estimation biases  
420 caused by different studies, experiments and individuals, the estimation was calculated by  
421 the log<sub>2</sub> ratio of read counts for svPDE over ENPP3 transcripts within a sample (i.e., a fold  
422 change of svPDE over ENPP3 expression). A count of zero was adjusted to a pseudo-  
423 count of one to prevent the undefinable log transformation of zero or infinitive values.

424

#### 425 **Purification of svPDE from the crude venom of *Naja atra***

426 One gram of crude venom was dissolved in 3 mL of 50 mM phosphate buffer (pH 6.2) with  
427 500 mM NaCl, filtered and applied to a Sephadex G-75 column (General Electric  
428 Company), pre-equilibrated with 50 mM phosphate buffer (pH 6.2). The fraction containing  
429 svPDE (the peak highlighted in red in ***SI Appendix, Fig. S1A***) was collected and applied  
430 to a MonoQ column (General Electric Company). The flow-through fraction (the peak  
431 highlighted in red in ***SI Appendix, Fig. S1B***) was concentrated, dialyzed against 50 mM  
432 phosphate buffer (pH 7.4) and applied to a Hitrap Heparin column (General Electric  
433 Company). The bound proteins were eluted with 50 mM phosphate buffer (pH 7.4) with a  
434 gradient of NaCl rising from 0 to 1M. The first eluted fraction (the peak highlighted in red ***SI***  
435 ***Appendix, Fig. S1C***) was concentrated, dialyzed against 35 mM phosphate buffer (pH  
436 7.2), and applied to a MonoS column (General Electric Company). Subsequently, 35 mM  
437 phosphate buffer (pH 7.2) with a gradient of NaCl from 0 to 1 M was used to elute the  
438 bound proteins. The fraction following the flow-through fraction (the peak highlighted in red  
439 in ***SI Appendix, Fig. S1D***) was concentrated and subjected to a Superdex 200 column  
440 (General Electric Company), pre-equilibrated in 20 mM HEPES (pH 7.4) with 100 mM  
441 NaCl. Molecular weight and the purity of svPDE were analyzed with a reducing 10% (w/v)  
442 SDS/PAGE followed by staining with Coomassie blue (inset in ***SI Appendix, Fig. S5E***).

#### 443 **Protein crystallization**

444 Crystallization of svPDE was performed at 293K by the hanging drop vapor-diffusion  
445 method. Pure protein solution (12 mg/ml) was mixed with a well solution containing 0.1 M  
446 imidazole (pH 6.6), 0.2 M zinc acetate and 23 % PEG 3350 in 1:1 volume ratio. Single  
447 crystals were grown to ~0.1 mm in the longest dimension after 15 days. To obtain crystals  
448 of svPDE in complex with AMP, the svPDE crystal, grown by mixing 1 µl of protein solution  
449 (12mg/ml) with 1 µl of well solution (0.1 M imidazole pH 6.5, 0.2 M zinc acetate and 20 %

450 PEG 3000), was soaked with 1 mM AMP for 2 days. svPDE crystals of apo form and AMP-  
451 complexed form were cryoprotected by a brief transfer to their respective reservoir  
452 solutions supplemented with 20% ethylene glycol before data collection.

### 453 **Structure determination and refinement**

454 The data sets of svPDE in the apo form (unliganded) and the AMP-complexed form were  
455 collected at BL13C1 and BL15A1 of NSRRC (National Synchrotron Radiation Research  
456 Center, Taiwan), respectively. Both data sets were indexed, integrated, and scaled with  
457 HKL2000. The structure was solved by molecular replacement with the program Phaser  
458 (McCoy et al., 2007) using the PDE and NUC domains from mouse ENPP1 (PDB  
459 accession: 4B56) as the search model. SMB1 and SMB2 domains from mouse ENPP2  
460 (PDB accession: 3NKM) were used as templates to build the N-terminal structure.  
461 Subsequently, structural refinements were performed using Coot (Emsley, Lohkamp, Scott,  
462 & Cowtan, 2010) and PHENIX (Liebschner et al., 2019). Crystallographic and refinement  
463 statistics are listed in **SI Appendix, Table S2**. All structure figures were obtained using  
464 PyMOL (Version 1.3, Schrödinger, LLC) and Chimera (Pettersen et al., 2004). The  
465 structure in the AMP-complexed form was solved by using the apo form of svPDE as a  
466 search model. However, there is no clear electron density map allowing us to build the  
467 SMB1 domain of svPDE in the AMP-complexed form, indicating the SMB1 domain could  
468 be highly flexible. B factor representations of svPDE in apo and AMP-complexed forms  
469 identified the N-terminus including SMB1 and SMB2 as a highly flexible region (**SI**  
470 **Appendix, Fig. S9**).

### 471 **Nucleotide and NAD degradation assay**

472 The nucleotide and NAD degradation activities of svPDE from *Naja atra* were analyzed by  
473 an HPLC equipped with an analytical C18 column. The reaction mixture containing 40 nM  
474 (for nucleotide degradation assay) or 80 nM (for NAD degradation assay) svPDE and 1  
475 mM ATP or ADP or NAD in 20 mM Tris-HCl (pH 8.0) was incubated at 37 °C. After various  
476 time periods, reactions were terminated by adding 1.0 N NaOH and analyzed by HPLC. In  
477 addition, enzyme kinetics of svPDE for nucleotides and NAD were also determined using  
478 HPLC. 40 nM (for nucleotide degradation) or 80 nM (for NAD degradation) svPDE was  
479 incubated with various concentrations of ATP or ADP or NAD in 20 mM Tris-HCl (pH 8.0) at  
480 37 °C. The reactions were terminated by addition of 1.0 N NaOH and analyzed by HPLC.  
481  $K_m$  and  $V_{max}$  were estimated from a Michaelis Menten plot of the initial rates as a function  
482 of substrate concentrations.  $k_{cat}$  was obtained using the equation:  $k_{cat} = V_{max} / [E]$ .

### 483 **Mass spectrometric analysis**

484 Trypsin digestion of svPDE from *Naja atra* was performed at an enzyme to substrate ratio  
485 of 1:50 (w/w) after the cysteine residues of svPDE were reduced and alkylated with  
486 dithiothreitol and iodoacetamide, respectively. Glycopeptides were enriched by hydrophilic  
487 interaction (HILIC) liquid chromatography using Superdex 75 prep grade resins. The

488 binding and wash buffers for HILIC were 75% acetonitrile (ACN), 0.1% formic acid (FA).  
489 Glycopeptides were eluted from the resins with 50% and then 25% ACN in the presence of  
490 0.1% FA. The dried glycopeptide mixtures were reconstituted with H<sub>2</sub>O, 0.1% FA and  
491 analyzed by liquid chromatography-tandem mass spectrometry (LC-MS/MS). The  
492 glycopeptides were separated on a reverse phase column (BEH C18, 0.1 x 100 mm,  
493 Waters Cooperation) at a flow rate of 300 nL/min using a 60-min ACN gradient in the  
494 presence of 0.1% FA. The effluents were analyzed online by an Orbitrap Elite hybrid mass  
495 spectrometer (Thermo Fisher Scientific Inc.). The mass spectrometer was operated in  
496 positive ion mode, and the tandem mass spectra (MS/MS) were acquired in a data-  
497 dependent manner. Briefly, the six most intense ions in the survey MS spectrum were  
498 selected for collision induced dissociation (CID) and then scanned in the orbitrap analyzer  
499 for obtaining the MS/MS spectra. The collected MS/MS spectra were subjected to  
500 glycopeptide identification using the Byonic software (Protein Matrix, inc.). The database  
501 search was performed against a focused database containing four venom glycoproteins  
502 (svPDE, L-amino acid oxidase, 5'-nucleotidase and cobra venom factor) with the following  
503 parameters: enzyme specificity, fully tryptic; maximum number of missed cleavages, 2;  
504 fixed modifications, carbamidomethylation of cysteine; variable modifications, oxidation of  
505 methionine, acetylation of protein N-terminus, and glutamine to pyroglutamate conversion  
506 at peptide N-terminus; N-glycans, 309 mammalian N-glycans provided by the Byonic  
507 software; mass tolerances, 15 ppm and 100 ppm for MS and MS/MS spectra, respectively.  
508 Finally, the matched proteins were filtered to 1% false discovery rates (FDRs) estimated by  
509 a decoy database search.

### 510 **Solid-phase binding assay**

511 The flat-bottomed, 394-well microliter plate was coated with 50 µg/ml svPDE in the  
512 presence of coating buffer (0.1M NaHCO<sub>3</sub>, pH 9.4). After 3 hours of incubation at 37 °C,  
513 the free surface of the wells was blocked by adding 5% BSA/PBS and the plate was  
514 incubated at 37 °C for an additional 2 hours. Human recombinant Galectin 3 (His tag)  
515 (Sino Biological Inc.) in PBS was then applied to the wells coated with svPDE after the  
516 wells were washed with PBST three times. The soluble Gal3-His was then allowed to  
517 interact with immobilized svPDE at 37 °C for 16 hours. In order to remove the unbound  
518 Gal3-His after reaction, the wells underwent three PBST washes. A mouse 6X His tag  
519 antibody (HRP) (GeneTex Inc.) was then used to recognize Gal3-His at room temperature  
520 for 1 hour. After washing with PBST for 3 times to eliminate nonspecific interactions, bound  
521 Gal3-His was quantified by measuring the absorbance at 450 nm after adding the  
522 substrate, 3,3',5,5'-Tetramethylbenzidine (TMB) for horseradish and 1N H<sub>2</sub>SO<sub>4</sub> for  
523 termination of the reaction.

### 524 **Acknowledgments**

525 This research was funded by Higher Education SPROUT Project launched by the Ministry  
526 of Education, Taiwan (R.O.C.). CTP and HHC were supported by Yushan Scholar

527 Program. We thank the experimental facility and the technical services provided by the  
528 “Synchrotron Radiation Protein Crystallography Facility of the National Core Facility  
529 Program for Biotechnology, Ministry of Science and Technology” and the “National  
530 Synchrotron Radiation Research Center”, a national user facility supported by the Ministry  
531 of Science and Technology, Taiwan (R.O.C.). We are also immensely grateful to Gerry  
532 Tonkin-Hill and Jessica K. Calland for improving the manuscript.  
533

## 534 **References**

- 535 Al-Saleh, S. S., & Khan, S. (2011). Purification and characterization of phosphodiesterase i from  
536 *Walterinnesia aegyptia* venom. *Prep Biochem Biotechnol*, *41*(3), 262-277.  
537 doi:10.1080/10826068.2011.575319
- 538 Almagro Armenteros, J. J., Tsirigos, K. D., Sonderby, C. K., Petersen, T. N., Winther, O., Brunak,  
539 S., . . . Nielsen, H. (2019). SignalP 5.0 improves signal peptide predictions using deep neural  
540 networks. *Nat Biotechnol*, *37*(4), 420-423. doi:10.1038/s41587-019-0036-z
- 541 Almeida, D. D., Viala, V. L., Nachtigall, P. G., Broe, M., Gibbs, H. L., Serrano, S. M. T., . . . Junqueira-  
542 de-Azevedo, I. L. M. (2021). Tracking the recruitment and evolution of snake toxins using  
543 the evolutionary context provided by the Bothrops jararaca genome. *Proc Natl Acad Sci U S*  
544 *A*, *118*(20). doi:10.1073/pnas.2015159118
- 545 Audrito, V., Messana, V. G., Brandimarte, L., & Deaglio, S. (2021). The Extracellular NADome  
546 Modulates Immune Responses. *Frontiers in Immunology*, *12*. doi:ARTN 704779  
547 10.3389/fimmu.2021.704779
- 548 Bernstein, J. M., Murphy, J. C., Voris, H. K., Brown, R. M., & Ruane, S. (2021). Phylogenetics of mud  
549 snakes (Squamata: Serpentes: Homalopsidae): A paradox of both undescribed diversity and  
550 taxonomic inflation. *Mol Phylogenet Evol*, *160*, 107109. doi:10.1016/j.ympev.2021.107109
- 551 Borza, R., Salgado-Polo, F., Moolenaar, W. H., & Perrakis, A. (2021). Structure and function of the  
552 ecto-nucleotide pyrophosphatase/phosphodiesterase (ENPP) family: Tidying up diversity. *J*  
553 *Biol Chem*, *298*(2), 101526. doi:10.1016/j.jbc.2021.101526
- 554 Burnstock, G. (2016). Purinergic Mechanisms and Pain. *Adv Pharmacol*, *75*, 91-137.  
555 doi:10.1016/bs.apha.2015.09.001
- 556 Chen, S., Zhou, Y., Chen, Y., & Gu, J. (2018). fastp: an ultra-fast all-in-one FASTQ preprocessor.  
557 *Bioinformatics*, *34*(17), i884-i890. doi:10.1093/bioinformatics/bty560
- 558 Chen, Y., Yu, P., Luo, J., & Jiang, Y. (2003). Secreted protein prediction system combining CJ-SPHMM,  
559 TMHMM, and PSORT. *Mamm Genome*, *14*(12), 859-865. doi:10.1007/s00335-003-2296-6
- 560 Cheng, H., Concepcion, G. T., Feng, X., Zhang, H., & Li, H. (2021). Haplotype-resolved de novo  
561 assembly using phased assembly graphs with hifiasm. *Nat Methods*, *18*(2), 170-175.  
562 doi:10.1038/s41592-020-01056-5
- 563 Cintra-Francischinelli, M., Caccin, P., Chiavegato, A., Pizzo, P., Carmignoto, G., Angulo, Y., . . .  
564 Montecucco, C. (2010). Bothrops snake myotoxins induce a large efflux of ATP and  
565 potassium with spreading of cell damage and pain. *Proc Natl Acad Sci U S A*, *107*(32),



- 566 14140-14145. doi:10.1073/pnas.1009128107
- 567 Damm, M., Hempel, B. F., Nalbantsoy, A., & Sussmuth, R. D. (2018). Comprehensive Snake  
568 Venomics of the Okinawa Habu Pit Viper, *Protobothrops flavoviridis*, by Complementary  
569 Mass Spectrometry-Guided Approaches. *Molecules*, *23*(8).  
570 doi:10.3390/molecules23081893
- 571 Damm, M., Hempel, B. F., & Sussmuth, R. D. (2021). Old World Vipers-A Review about Snake  
572 Venom Proteomics of Viperinae and Their Variations. *Toxins (Basel)*, *13*(6).  
573 doi:10.3390/toxins13060427
- 574 Emsley, P., Lohkamp, B., Scott, W. G., & Cowtan, K. (2010). Features and development of Coot. *Acta  
575 Crystallogr D Biol Crystallogr*, *66*(Pt 4), 486-501. doi:10.1107/S0907444910007493
- 576 Giorgianni, M. W., Dowell, N. L., Griffin, S., Kassner, V. A., Selegue, J. E., & Carroll, S. B. (2020). The  
577 origin and diversification of a novel protein family in venomous snakes. *Proc Natl Acad Sci U  
578 S A*, *117*(20), 10911-10920. doi:10.1073/pnas.1920011117
- 579 Gordon, J. L. (1986). Extracellular Atp - Effects, Sources and Fate. *Biochemical Journal*, *233*(2), 309-  
580 319. doi:DOI 10.1042/bj2330309
- 581 Grabherr, M. G., Haas, B. J., Yassour, M., Levin, J. Z., Thompson, D. A., Amit, I., . . . Regev, A. (2011).  
582 Full-length transcriptome assembly from RNA-Seq data without a reference genome. *Nat  
583 Biotechnol*, *29*(7), 644-652. doi:10.1038/nbt.1883
- 584 Gren, E. C. K., Kitano, E. S., Andrade-Silva, D., Iwai, L. K., Reis, M. S., Menezes, M. C., & Serrano, S.  
585 M. T. (2019). Comparative analysis of the high molecular mass subproteomes of eight  
586 Bothrops snake venoms. *Comp Biochem Physiol Part D Genomics Proteomics*, *30*, 113-121.  
587 doi:10.1016/j.cbd.2019.01.012
- 588 Gutierrez, J. M., Calvete, J. J., Habib, A. G., Harrison, R. A., Williams, D. J., & Warrell, D. A. (2017).  
589 Snakebite envenoming. *Nat Rev Dis Primers*, *3*, 17063. doi:10.1038/nrdp.2017.63
- 590 Haag, F., Adriouch, S., Brass, A., Jung, C., Moller, S., Scheuplein, F., . . . Koch-Nolte, F. (2007).  
591 Extracellular NAD and ATP: Partners in immune cell modulation. *Purinergic Signalling*, *3*(1-  
592 2), 71-81. doi:10.1007/s11302-006-9038-7
- 593 Hu, J., Fan, J., Sun, Z., & Liu, S. (2020). NextPolish: a fast and efficient genome polishing tool for  
594 long-read assembly. *Bioinformatics*, *36*(7), 2253-2255. doi:10.1093/bioinformatics/btz891
- 595 Huang, H. W., Liu, B. S., Chien, K. Y., Chiang, L. C., Huang, S. Y., Sung, W. C., & Wu, W. G. (2015).  
596 Cobra venom proteome and glycome determined from individual snakes of *Naja atra* reveal  
597 medically important dynamic range and systematic geographic variation. *J Proteomics*, *128*,  
598 92-104. doi:10.1016/j.jprot.2015.07.015
- 599 Kato, K., Nishimasu, H., Okudaira, S., Mihara, E., Ishitani, R., Takagi, J., . . . Nureki, O. (2012). Crystal  
600 structure of Enpp1, an extracellular glycoprotein involved in bone mineralization and insulin  
601 signaling. *Proc Natl Acad Sci U S A*, *109*(42), 16876-16881. doi:10.1073/pnas.1208017109
- 602 Kohler, G., Khaing, K. P. P., Than, N. L., Baranski, D., Schell, T., Greve, C., . . . Pauls, S. U. (2021). A  
603 new genus and species of mud snake from Myanmar (Reptilia, Squamata, Homalopsidae).  
604 *Zootaxa*, *4915*(3), zootaxa 4915 4913 4911. doi:10.11646/zootaxa.4915.3.1
- 605 Korekane, H., Park, J. Y., Matsumoto, A., Nakajima, K., Takamatsu, S., Ohtsubo, K., . . . Taniguchi, N.



- 606 (2013). Identification of ectonucleotide pyrophosphatase/phosphodiesterase 3 (ENPP3) as  
607 a regulator of N-acetylglucosaminyltransferase GnT-IX (GnT-Vb). *J Biol Chem*, *288*(39),  
608 27912-27926. doi:10.1074/jbc.M113.474304
- 609 Laustsen, A. H., Gutierrez, J. M., Lohse, B., Rasmussen, A. R., Fernandez, J., Milbo, C., & Lomonte,  
610 B. (2015). Snake venomomics of monocled cobra (*Naja kaouthia*) and investigation of human  
611 IgG response against venom toxins. *Toxicon*, *99*, 23-35. doi:10.1016/j.toxicon.2015.03.001
- 612 Li, P., Liu, S., Lu, M., Bandyopadhyay, G., Oh, D., Imamura, T., . . . Olefsky, J. M. (2016).  
613 Hematopoietic-Derived Galectin-3 Causes Cellular and Systemic Insulin Resistance. *Cell*,  
614 *167*(4), 973-984 e912. doi:10.1016/j.cell.2016.10.025
- 615 Li, P. P., Liu, S. N., Lu, M., Bandyopadhyay, G., Oh, D., Imamura, T., . . . Olefsky, J. M. (2016).  
616 Hematopoietic-Derived Galectin-3 Causes Cellular and Systemic Insulin Resistance. *Cell*,  
617 *167*(4), 973-+. doi:10.1016/j.cell.2016.10.025
- 618 Liebschner, D., Afonine, P. V., Baker, M. L., Bunkoczi, G., Chen, V. B., Croll, T. I., . . . Adams, P. D.  
619 (2019). Macromolecular structure determination using X-rays, neutrons and electrons:  
620 recent developments in Phenix. *Acta Crystallogr D Struct Biol*, *75*(Pt 10), 861-877.  
621 doi:10.1107/S2059798319011471
- 622 Long, M. (2001). Evolution of novel genes. *Curr Opin Genet Dev*, *11*(6), 673-680.  
623 doi:10.1016/s0959-437x(00)00252-5
- 624 Maddux, B. A., & Goldfine, I. D. (2000). Membrane glycoprotein PC-1 inhibition of insulin receptor  
625 function occurs via direct interaction with the receptor alpha-subunit. *Diabetes*, *49*(1), 13-  
626 19. doi:DOI 10.2337/diabetes.49.1.13
- 627 Margres, M. J., Rautsaw, R. M., Strickland, J. L., Mason, A. J., Schramer, T. D., Hofmann, E. P., . . .  
628 Parkinson, C. L. (2021). The Tiger Rattlesnake genome reveals a complex genotype  
629 underlying a simple venom phenotype. *Proc Natl Acad Sci U S A*, *118*(4).  
630 doi:10.1073/pnas.2014634118
- 631 McCoy, A. J., Grosse-Kunstleve, R. W., Adams, P. D., Winn, M. D., Storoni, L. C., & Read, R. J. (2007).  
632 Phaser crystallographic software. *J Appl Crystallogr*, *40*(Pt 4), 658-674.  
633 doi:10.1107/S0021889807021206
- 634 Mitra, J., & Bhattacharyya, D. (2014). Phosphodiesterase from *Daboia russelli russelli* venom:  
635 purification, partial characterization and inhibition of platelet aggregation. *Toxicon*, *88*, 1-  
636 10. doi:10.1016/j.toxicon.2014.06.004
- 637 Modahl, C. M., Roointan, A., Rogers, J., Currier, K., & Mackessy, S. P. (2020). Interspecific and  
638 intraspecific venom enzymatic variation among cobras (*Naja* sp. and *Ophiophagus hannah*).  
639 *Comp Biochem Physiol C Toxicol Pharmacol*, *232*, 108743. doi:10.1016/j.cbpc.2020.108743
- 640 Mori, Y., Shiratsuchi, N., Sato, N., Chaya, A., Tanimura, N., Ishikawa, S., . . . Fujita, Y. (2022).  
641 Extracellular ATP facilitates cell extrusion from epithelial layers mediated by cell  
642 competition or apoptosis. *Curr Biol*, *32*(10), 2144-2159 e2145.  
643 doi:10.1016/j.cub.2022.03.057
- 644 Ogawa, T., Oda-Ueda, N., Hisata, K., Nakamura, H., Chijiwa, T., Hattori, S., . . . Shibata, H. (2019).  
645 Alternative mRNA Splicing in Three Venom Families Underlying a Possible Production of

- 646 Divergent Venom Proteins of the Habu Snake, *Protobothrops flavoviridis*. *Toxins (Basel)*,  
647 11(10). doi:10.3390/toxins11100581
- 648 Oliveira, I. S., Pucca, M. B., Wiesel, G. A., Cardoso, I. A., Bordon, K. C. F., Sartim, M. A., . . . Arantes,  
649 E. C. (2021). Unraveling the structure and function of CdcPDE: A novel phosphodiesterase  
650 from *Crotalus durissus collilineatus* snake venom. *Int J Biol Macromol*, 178, 180-192.  
651 doi:10.1016/j.ijbiomac.2021.02.120
- 652 Pan, C. T., & Lin, Y. S. (2020). MicroRNA retrocopies generated via L1-mediated retrotransposition  
653 in placental mammals help to reveal how their parental genes were transcribed. *Sci Rep*,  
654 10(1), 20612. doi:10.1038/s41598-020-77381-8
- 655 Peng, C., Ren, J. L., Deng, C., Jiang, D., Wang, J., Qu, J., . . . Li, J. T. (2020). The Genome of Shaw's  
656 Sea Snake (*Hydrophis curtus*) Reveals Secondary Adaptation to Its Marine Environment.  
657 *Mol Biol Evol*, 37(6), 1744-1760. doi:10.1093/molbev/msaa043
- 658 Peng, L., Xu, X., Shen, D., Zhang, Y., Song, J., Yan, X., & Guo, M. (2011). Purification and partial  
659 characterization of a novel phosphodiesterase from the venom of *Trimeresurus stejnegeri*:  
660 inhibition of platelet aggregation. *Biochimie*, 93(9), 1601-1609.  
661 doi:10.1016/j.biochi.2011.05.027
- 662 Pettersen, E. F., Goddard, T. D., Huang, C. C., Couch, G. S., Greenblatt, D. M., Meng, E. C., & Ferrin,  
663 T. E. (2004). UCSF Chimera--a visualization system for exploratory research and analysis. *J*  
664 *Comput Chem*, 25(13), 1605-1612. doi:10.1002/jcc.20084
- 665 Portillo, F., Stanley, E. L., Branch, W. R., Conradie, W., Rodel, M. O., Penner, J., . . . Greenbaum, E.  
666 (2019). Evolutionary history of burrowing asps (Lamprophiidae: Atractaspidinae) with  
667 emphasis on fang evolution and prey selection. *PLoS One*, 14(4), e0214889.  
668 doi:10.1371/journal.pone.0214889
- 669 Rao, W. Q., Kalogeropoulos, K., Allentoft, M. E., Gopalakrishnan, S., Zhao, W. N., Workman, C.  
670 T., . . . Laustsen, A. H. (2022). The rise of genomics in snake venom research: recent  
671 advances and future perspectives. *Gigascience*, 11. doi:10.1093/gigascience/giac024
- 672 Reyes-Velasco, J., Card, D. C., Andrew, A. L., Shaney, K. J., Adams, R. H., Schield, D. R., . . . Castoe, T.  
673 A. (2015). Expression of venom gene homologs in diverse python tissues suggests a new  
674 model for the evolution of snake venom. *Mol Biol Evol*, 32(1), 173-183.  
675 doi:10.1093/molbev/msu294
- 676 Santoro, M. L., Vaquero, T. S., Paes Leme, A. F., & Serrano, S. M. (2009). NPP-BJ, a nucleotide  
677 pyrophosphatase/phosphodiesterase from *Bothrops jararaca* snake venom, inhibits platelet  
678 aggregation. *Toxicon*, 54(4), 499-512. doi:10.1016/j.toxicon.2009.05.016
- 679 Sloutskin, A., Danino, Y. M., Orenstein, Y., Zehavi, Y., Doniger, T., Shamir, R., & Juven-Gershon, T.  
680 (2015). ElemeNT: a computational tool for detecting core promoter elements.  
681 *Transcription*, 6(3), 41-50. doi:10.1080/21541264.2015.1067286
- 682 Sorek, R. (2007). The birth of new exons: mechanisms and evolutionary consequences. *RNA*,  
683 13(10), 1603-1608. doi:10.1261/rna.682507
- 684 Stock, R. P., Massougbodji, A., Alagon, A., & Chippaux, J. P. (2007). Bringing antivenoms to Sub-  
685 Saharan Africa. *Nat Biotechnol*, 25(2), 173-177. doi:10.1038/nbt0207-173

- 686 Storer, J., Hubley, R., Rosen, J., Wheeler, T. J., & Smit, A. F. (2021). The Dfam community resource of  
687 transposable element families, sequence models, and genome annotations. *Mob DNA*,  
688 *12*(1), 2. doi:10.1186/s13100-020-00230-y
- 689 Suryamohan, K., Krishnankutty, S. P., Guillory, J., Jevit, M., Schroder, M. S., Wu, M., . . . Seshagiri, S.  
690 (2020). The Indian cobra reference genome and transcriptome enables comprehensive  
691 identification of venom toxins. *Nat Genet*, *52*(1), 106-117. doi:10.1038/s41588-019-0559-8
- 692 Tan, C. H., Tan, K. Y., Fung, S. Y., & Tan, N. H. (2015). Venom-gland transcriptome and venom  
693 proteome of the Malaysian king cobra (*Ophiophagus hannah*). *BMC Genomics*, *16*, 687.  
694 doi:10.1186/s12864-015-1828-2
- 695 Tan, N. H., & Tan, C. S. (1988). A comparative study of cobra (*Naja*) venom enzymes. *Comp Biochem*  
696 *Physiol B*, *90*(4), 745-750. doi:10.1016/0305-0491(88)90329-x
- 697 Trummal, K., Aaspollu, A., Tonismagi, K., Samel, M., Subbi, J., Siigur, J., & Siigur, E. (2014).  
698 Phosphodiesterase from *Vipera lebetina* venom - structure and characterization. *Biochimie*,  
699 *106*, 48-55. doi:10.1016/j.biochi.2014.07.020
- 700 Tsai, S. H., Kinoshita, M., Kusu, T., Kayama, H., Okumura, R., Ikeda, K., . . . Takeda, K. (2015). The  
701 Ectoenzyme E-NPP3 Negatively Regulates ATP-Dependent Chronic Allergic Responses by  
702 Basophils and Mast Cells. *Immunity*, *42*(2), 279-293. doi:10.1016/j.immuni.2015.01.015
- 703 Tsetlin, V. I. (2015). Three-finger snake neurotoxins and Ly6 proteins targeting nicotinic  
704 acetylcholine receptors: pharmacological tools and endogenous modulators. *Trends*  
705 *Pharmacol Sci*, *36*(2), 109-123. doi:10.1016/j.tips.2014.11.003
- 706 Valerio, A. A., Corradini, A. C., Panunto, P. C., Mello, S. M., & Hyslop, S. (2002). Purification and  
707 characterization of a phosphodiesterase from *Bothrops alternatus* snake venom. *J Protein*  
708 *Chem*, *21*(8), 495-503. doi:10.1023/a:1022414503995
- 709 Verta, J. P., & Jacobs, A. (2022). The role of alternative splicing in adaptation and evolution. *Trends*  
710 *Ecol Evol*, *37*(4), 299-308. doi:10.1016/j.tree.2021.11.010
- 711 Westeen, E. P., Durso, A. M., Grundler, M. C., Rabosky, D. L., & Davis Rabosky, A. R. (2020). What  
712 makes a fang? Phylogenetic and ecological controls on tooth evolution in rear-fanged  
713 snakes. *BMC Evol Biol*, *20*(1), 80. doi:10.1186/s12862-020-01645-0
- 714 Wheeler, T. J., & Eddy, S. R. (2013). nhmmer: DNA homology search with profile HMMs.  
715 *Bioinformatics*, *29*(19), 2487-2489. doi:10.1093/bioinformatics/btt403  
716  
717

## 718 Figures

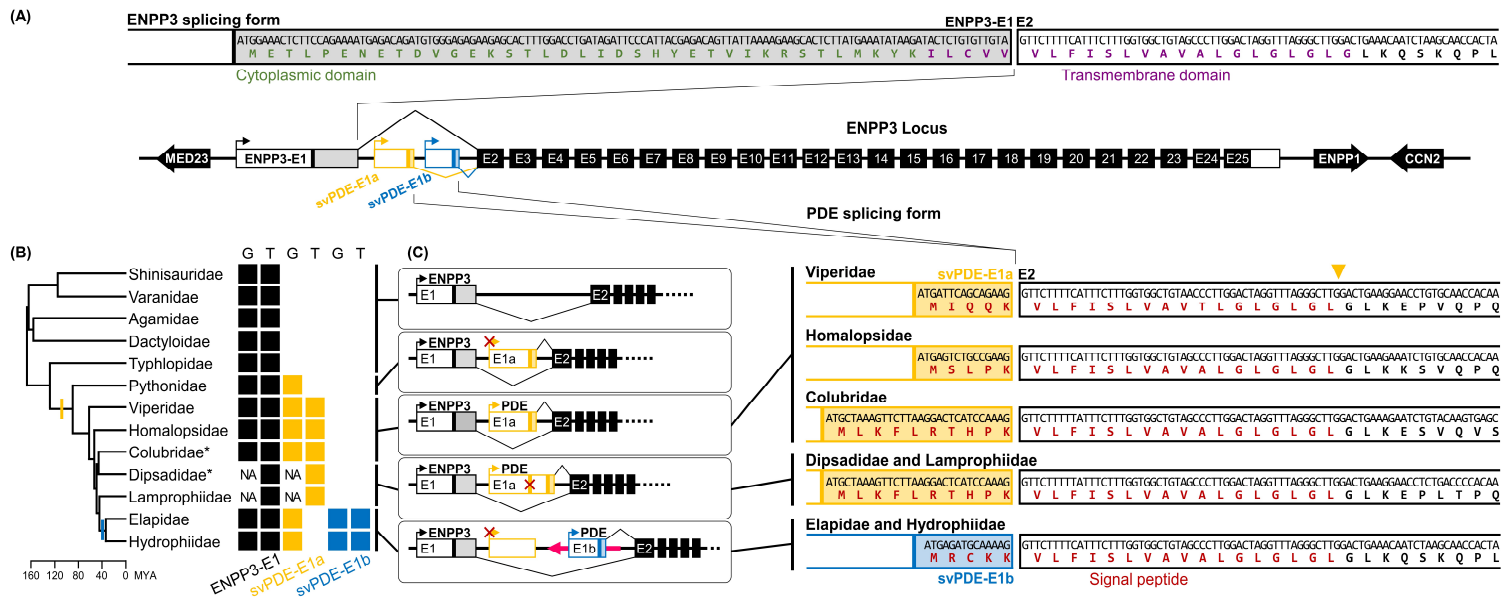

720 **Fig. 1** (A) N-terminal of peptide sequences of ENPP3 and PDE encoded by alternative  
721 splicing. The scheme of exons and genomic synteny are presented with flanking coding  
722 genes. The 5' untranslated regions (5' UTR) and coding regions of first exons are  
723 separated by colored vertical lines, which are the translation start codons. Only the lengths  
724 of E1, E1a and E1b are drawn in scale. Putative promoters identified in the proximal  
725 upstream are indicated with arrows attached to the first exons. The same elements are  
726 expressed by the same colors throughout the figure. The sequences around splicing  
727 junctions of E1 and E2 are zoomed in with translated peptides of functional domains  
728 highlighted in corresponding colors. The yellow triangle indicates the putative cleavage site  
729 of the signal peptidase. (B) Presences and absences of ENPP3-specific and svPDE-  
730 specific E1s in different clades. Color-filled squares denote the exons identified in the  
731 genomes "G" and transcriptomes "T", where "NA" indicates the clades without available  
732 genome assemblies. Clades with asterisks use Duvernoy's glands as their venom delivery  
733 system. The colored vertical lines on the phylogenetic tree indicate the inferred branches  
734 that svPDE-E1a (yellow) and svPDE-E1b (blue) emerged. (C) The scheme of alternative  
735 splicing of ENPP3 and svPDE transcripts in different clades. The possible malfunctioned  
736 elements, including svPDE-E1a promoters in Pythonidae, Elapidae and Hydrophiidae, and  
737 ancestral translation start sites in Dipsadidae and Lamprophiidae, are crossed out in red.  
738 The long pink arrow indicates the mobile element.





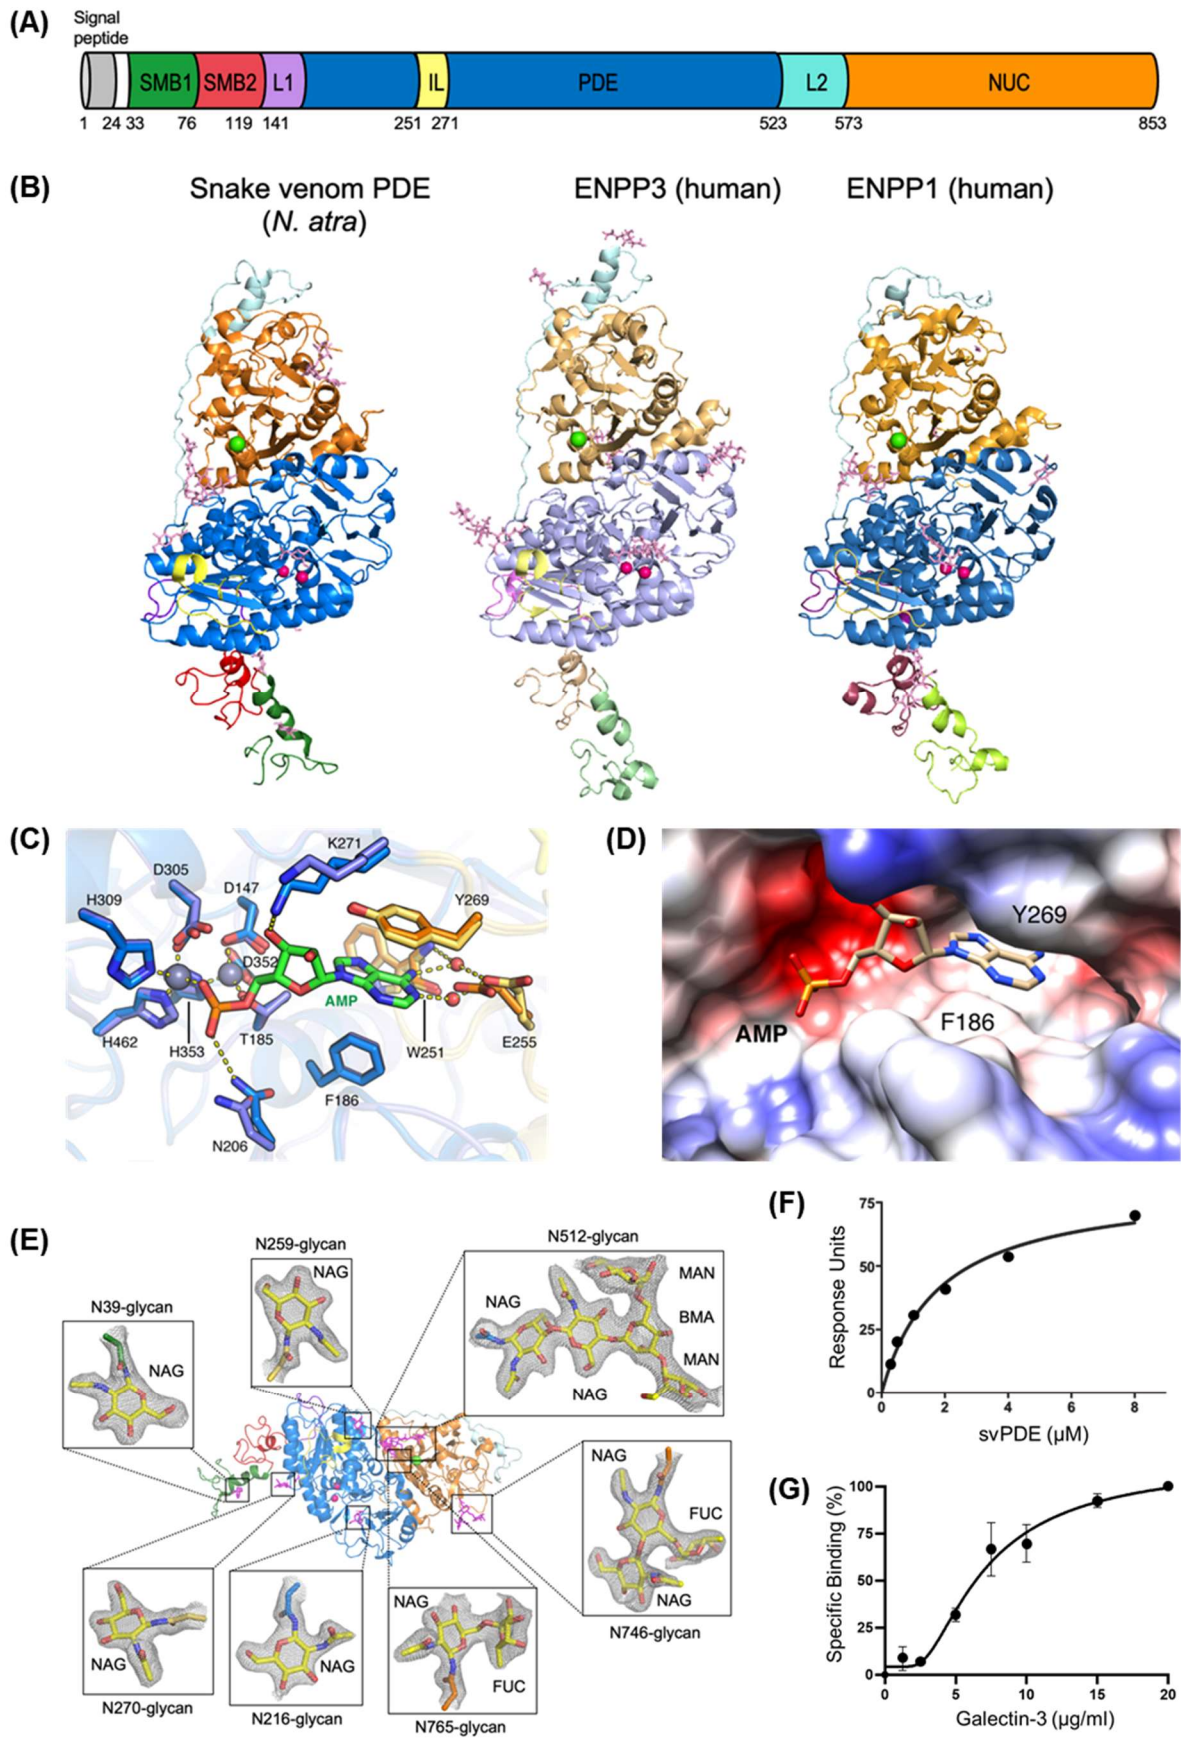



757 **Fig. 3** (A) Domain organizations of *Naja atra* svPDE. SMB1, somatomedin-B-like 1  
758 domain; SMB2, somatomedin-B-like 2 domain; L1, loop 1; PDE, catalytic  
759 phosphodiesterase domain; IL, insertion loop; L2, loop 2; NUC, nuclease-like domain. (B)  
760 Crystal structures of svPDE from *Naja atra* (PDB code: 5GZ4), human ENPP3 (PDB code:  
761 6C01) and human ENPP1 (PDB code: 6WET) in cartoon representation. Zinc and calcium  
762 ions are shown as hot pink and green spheres, respectively. N-glycans are shown as light  
763 pink sticks. (C) Superposition of active sites of svPDE from *Naja atra* in the apo and AMP-  
764 complexed forms. Zinc atoms are shown as grey spheres and water atoms are shown as  
765 red ones. Residues involving AMP binding in the apo and AMP-complexed forms are  
766 shown in slate/orange and marine/yellow, respectively. Hydrogen bonds and coordinate  
767 bonds are shown as dashed yellow lines. (D) Electrostatic potential surface of the  
768 nucleotide-binding pocket of svPDE from *Naja atra* in the AMP-complexed form. (E) N-  
769 glycans at Asn39, Asn216, Asn259, Asn270, Asn512 and Asn746 of svPDE from *Naja atra*  
770 are shown as sticks with electron densities. 2Fo-Fc electron density maps contoured at  
771  $1.0\sigma$ . (F) Surface plasmon resonance (SPR) investigation of the binding between svPDE  
772 (0.25, 0.5, 1.0, 2.0, 4.0, and 8.0  $\mu\text{M}$ ) and the immobilized insulin receptor.  $K_D$  of svPDE  
773 binding to the insulin receptor were obtained by steady-state affinity model. (G) Binding  
774 affinity measurement of Gal-3 with svPDE from *Naja atra*. Standard deviations of three  
775 replicates were indicated.

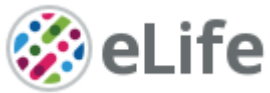

## Supporting Information for

# The evolution and structure of snake venom phosphodiesterase (svPDE) highlight its importance in venom actions

Cheng-Tsung Pan<sup>1,2</sup>, Chien-Chu Lin<sup>1</sup>, I-Jin Lin<sup>1</sup>, Kun-Yi Chien<sup>3</sup>, Yeong-Shin Lin<sup>4\*</sup>, Hsiao-Han Chang<sup>1,5,6\*</sup>, Wen-Guey Wu<sup>1,5\*</sup>

<sup>1</sup> Institute of Bioinformatics and Structural Biology, National Tsing Hua University, Hsinchu, Taiwan

<sup>2</sup> Department of Biostatistics, University of Oslo, Oslo, Norway

<sup>3</sup> Graduate Institute of Biomedical Sciences, Department of Biochemistry and Molecular Biology, School of Medicine, Chang Gung University, Taiwan

<sup>4</sup> Institute of Bioinformatics and Systems Biology, National Yang Ming Chiao Tung University, Hsinchu, Taiwan

<sup>5</sup> Department of Life Science, National Tsing Hua University, Hsinchu, Taiwan

<sup>6</sup> Institute of Molecular and Cellular Biology, National Tsing Hua University, Hsinchu, Taiwan

\*Co-corresponding authors: Yeong-Shin Lin, Hsiao-Han Chang, Wen-Guey Wu

**Email:** YSL      yslin@nycu.edu.tw  
          HHC      hhchang@life.nthu.edu.tw  
          WGW      wgwu@life.nthu.edu.tw

### This PDF file includes:

Figures S1 to S9

Tables S1 to S6



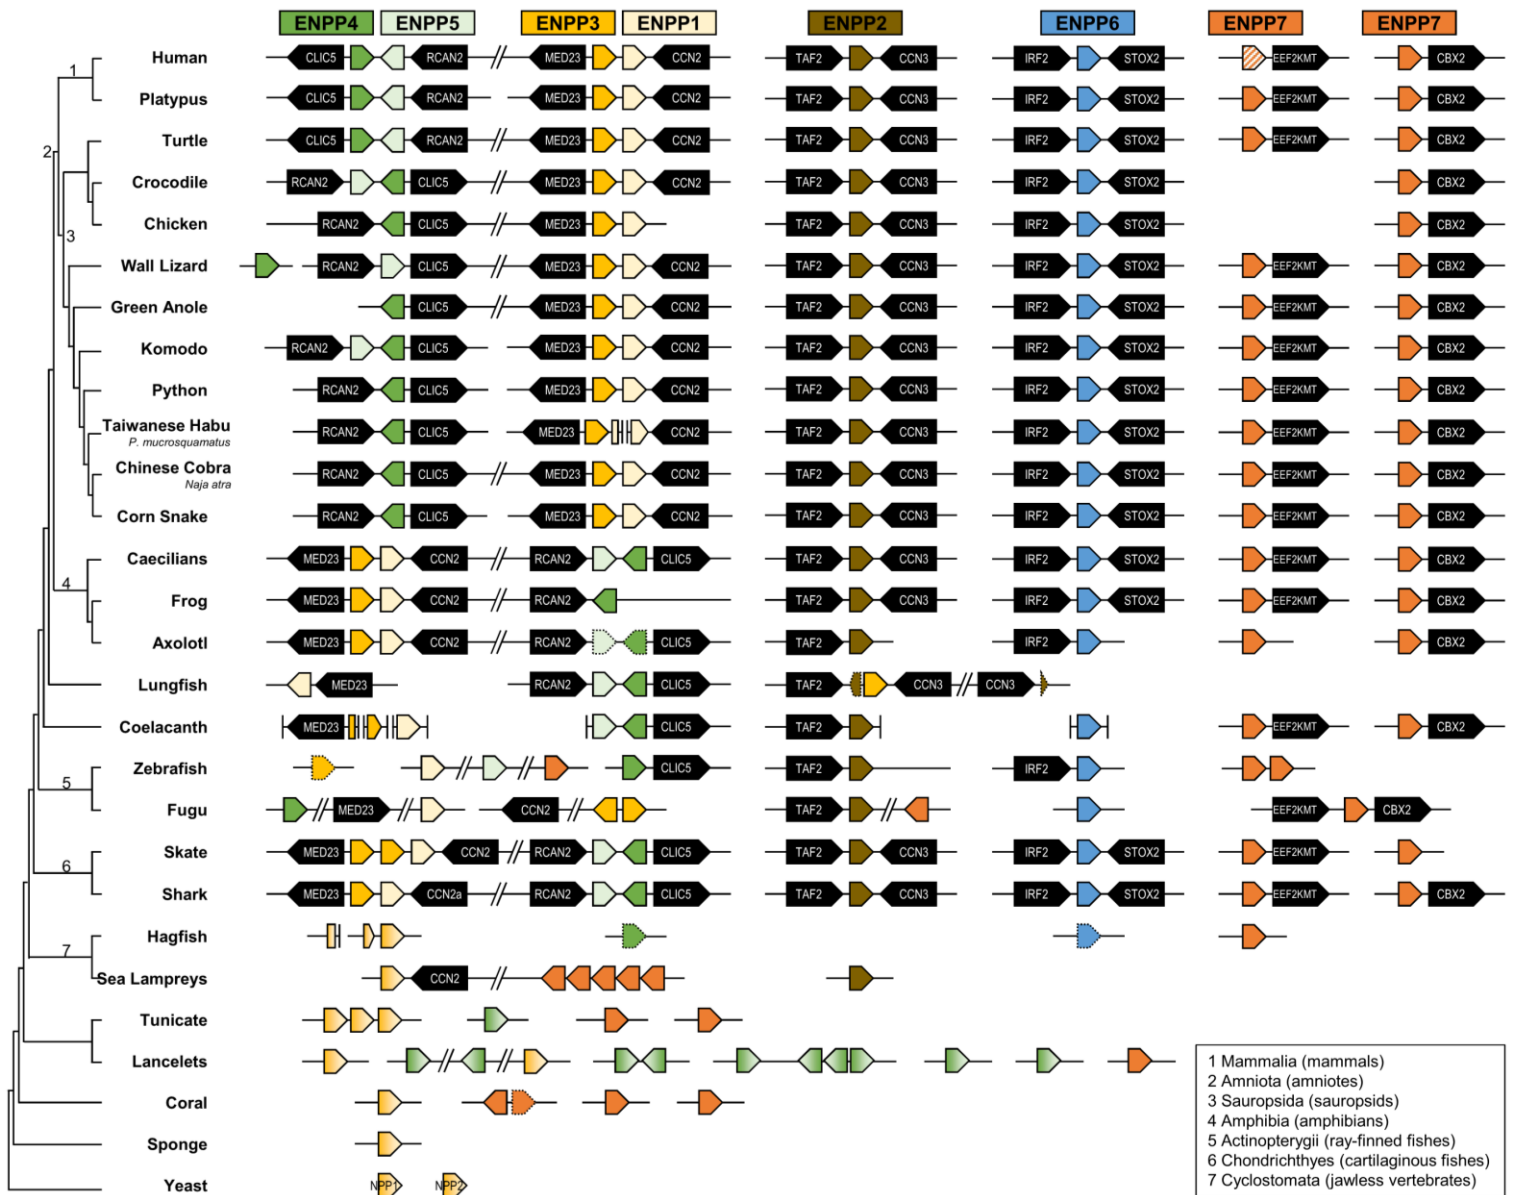

**Fig. S2 Presences and absences of ENPP family members across eukaryotes.** Seven members of ENPP families are represented in pentagons with corresponding colors. Their genomic synteny are shown with the conserved flanking genes (blacked pentagons). ENPP genes with gradient colors are genes diverged before the divergence of two named ENPP family members (e.g., a gene phylogenetically clustered with the common ancestor of ENPP3 and ENPP1 is drawn in a gradient yellow). Genes with only a few conserved exons regarded as evolutionary relics are indicated with dotted borders. One human ENPP7 denoted by slashes is a confirmed pseudogene in the latest genome annotation release. Genes on a single continuous horizontal line are located on the same contig or chromosome. Vertical lines indicate the assembled ends of contigs or chromosomes. Genes fragmentedly located on different contigs that could infer the coordinates by genomic synteny are drawn by order. The branch lengths of the cladogram are not drawn proportional to the evolutionary time.

|                                                                                                | E1                                         | E2 junction                 |
|------------------------------------------------------------------------------------------------|--------------------------------------------|-----------------------------|
| <b>ENPP3-E1</b>                                                                                |                                            |                             |
| [P] <i>P. molurus</i> (Python)                                                                 | METLSAE--ETTLGKSNLELIDCQTEITLVKSTLRKYILCA  | VLFIISLVVVALGLGLGLGLKKSVEPQ |
| [V] <i>P. flavoviridis</i> (Habu)                                                              | MEMFPEDKDETEMENKSTDSLDFQKTEIIRKSTLRKYIKLCV | VLFIISLVAVALGLGLGLGLKKSVEPQ |
| [V] <i>B. jararaca</i> (Jararaca)                                                              | MEMFPEDTDETEMGEKSTLDLDFQTERIIRKSTLRKYIKLCV | VLFIISLVAVALGLGLGLGLKKSVEPQ |
| [V] <i>P. mucrosquamatus</i> (TH)                                                              | MEMFPEDKDETEMGEKSTADLDFQTEIIRKSTLRKYIKLCV  | VLFIISLVAVALGLGLGLGLKKSVEPQ |
| [V] <i>C. viridis</i> (PR)                                                                     | MEMFPEDKDETEMGEKRTLDLDFQTERIIRKSTLRKYIKLCV | VLFIISLVAVALGLGLGLGLKKSVEPQ |
| [V] <i>C. tigris</i> (TR)                                                                      | MEMFPEDKDETEMGEKSTLDLDFQTERIIRKSTLRKYIKLCV | VLFIISLVAVALGLGLGLGLKKSVEPQ |
| [H] <i>H. thanlyinensis</i>                                                                    | METISAN--ETDMGEKSIWD---HSEPIINKSTLRKYIKLCV | VLFIISLVAVALGLGLGLGLKKSVEPQ |
| [H] <i>H. buccata</i> (MWS)                                                                    | METISAN--ETDMGEKSTLDLDSHSEPIIRKSTLRKYIKLCV | VLFIISLVAVALGLGLGLGLKKSVEPQ |
| [C] <i>T. sirtalis</i> (CGS)                                                                   | MEMLVAD--KTHMGERSTLDLDSHTEIIRKSTLRKYIKLCV  | VLFIISLVAVALGLGLGLGLKKSVEPQ |
| [C] <i>P. guttatus</i> (CS)                                                                    | METIAAD--ETNFGKSTLDLDSHSEPMIKRSTLRKYIKLCV  | VLFIISLVAVALGLGLGLGLKKSVEPQ |
| [C] <i>P. catenifer</i> (GS)                                                                   | METIAAD--KTNFGKSTLDLDSHSEPMIKRSTLRKYIKLCV  | VLFIISLVAVALGLGLGLGLKKSVEPQ |
| [C] <i>P. obsoletus</i> (WRS)                                                                  | METIAAD--ETNFGKSTLDLDSHSEPMIKRSTLRKYIKLCV  | VLFIISLVAVALGLGLGLGLKKSVEPQ |
| [C] <i>T. elegans</i> (WTGS)                                                                   | METLVAD--KTHMGERSTLDLDSHTEIIRKSTLRKYIKLCV  | VLFIISLVAVALGLGLGLGLKKSVEPQ |
| [C] <i>R. subminiatus</i> (RK)                                                                 | METLAAD--ETDMGEKSTLDLDSHSEPMIKRSTLRKYIKLCV | VLFIISLVAVALGLGLGLGLKKSVEPQ |
| [C] <i>T. conanti</i>                                                                          | METLVAD--KTHMGERSTLDLDSHTEIIRKSTLRKYIKLCV  | VLFIISLVAVALGLGLGLGLKKSVEPQ |
| [C] <i>T. nigriceps</i> (PBS)                                                                  | METLVAD--KTHMGERSTLDLDSHTEIIRKSTLRKYIKLCV  | VLFIISLVAVALGLGLGLGLKKSVEPQ |
| [D] <i>H. nasicus</i> (WHS)                                                                    | METLAAD--ETDMGEKSTLDLDSHSEPMIKRSTLRKYIKLCV | VLFIISLVAVALGLGLGLGLKKSVEPQ |
| [D] <i>C. lineatus</i>                                                                         | METLAAD--ETDMGEKSTLDLDSHSEPMIKRSTLRKYIKLCV | VLFIISLVAVALGLGLGLGLKKSVEPQ |
| [D] <i>H. leopardinus</i>                                                                      | METLAAD--ETDMGEKSTLDLDSHSEPMIKRSTLRKYIKLCV | VLFIISLVAVALGLGLGLGLKKSVEPQ |
| [L] <i>P. subtaeniatus</i> (WYSS)                                                              | METLPAE--ETEIGEKSSLDLDSHPEKIVKRSTLRKYIKLCV | VLFIISLVAVALGLGLGLGLKKSVEPQ |
| [L] <i>P. schokari</i> (SSR)                                                                   | METLPAE--ETEIGEKSSLDLDSHPEKIVKRSTLRKYIKLCV | VLFIISLVAVALGLGLGLGLKKSVEPQ |
| [L] <i>M. monspessulanus</i> (MS)                                                              | METLPAE--ETEIGEKSSLDLDSHPEKIVKRSTLRKYIKLCV | VLFIISLVAVALGLGLGLGLKKSVEPQ |
| [E] <i>O. hannah</i> (KC)                                                                      | METLPED--QTDMEKSTLDLDSHSEPMIKRSTLRKYIKLCV  | VLFIISLVAVALGLGLGLGLKKSVEPQ |
| [E] <i>N. scutatus</i> (MTS)                                                                   | METLPED--QTDMEKSTLDLDSHSEPMIKRSTLRKYIKLCV  | VLFIISLVAVALGLGLGLGLKKSVEPQ |
| [E] <i>L. colubrina</i> (YSK)                                                                  | METLPED--QTDMEKSTLDLDSHSEPMIKRSTLRKYIKLCV  | VLFIISLVAVALGLGLGLGLKKSVEPQ |
| [E] <i>M. aegyptia</i> (DC)                                                                    | METLPED--QTDMEKSTLDLDSHSEPMIKRSTLRKYIKLCV  | VLFIISLVAVALGLGLGLGLKKSVEPQ |
| [E] <i>H. haemachatus</i> (RH)                                                                 | METLPED--QT--EKSTLDLDSHSEPMIKRSTLRKYIKLCV  | VLFIISLVAVALGLGLGLGLKKSVEPQ |
| [E] <i>N. annulifera</i> (SC)                                                                  | METLPEN--ETDMGEKSTLDLDSHSEPMIKRSTLRKYIKLCV | VLFIISLVAVALGLGLGLGLKKSVEPQ |
| [E] <i>N. atra</i> (CC)                                                                        | METLPEN--ETDMGEKSTLDLDSHSEPMIKRSTLRKYIKLCV | VLFIISLVAVALGLGLGLGLKKSVEPQ |
| [E] <i>N. haje</i> (EC)                                                                        | METLPEN--ETDMGEKSTLDLDSHSEPMIKRSTLRKYIKLCV | VLFIISLVAVALGLGLGLGLKKSVEPQ |
| [E] <i>N. kaouthia</i> (MC)                                                                    | METLPEN--ETDMGEKSTLDLDSHSEPMIKRSTLRKYIKLCV | VLFIISLVAVALGLGLGLGLKKSVEPQ |
| [E] <i>N. naja</i> (IC)                                                                        | METLPEN--ETDMGEKSTLDLDSHSEPMIKRSTLRKYIKLCV | VLFIISLVAVALGLGLGLGLKKSVEPQ |
| [E] <i>N. nigricollis</i> (BSC)                                                                | METLPEN--ETDMGEKSTLDLDSHSEPMIKRSTLRKYIKLCV | VLFIISLVAVALGLGLGLGLKKSVEPQ |
| [E] <i>N. nivea</i> (Cape Cobra)                                                               | METLPEN--ETDMGEKSTLDLDSHSEPMIKRSTLRKYIKLCV | VLFIISLVAVALGLGLGLGLKKSVEPQ |
| [E] <i>N. pallida</i> (RSC)                                                                    | METLPEN--ETDMGEKSTLDLDSHSEPMIKRSTLRKYIKLCV | VLFIISLVAVALGLGLGLGLKKSVEPQ |
| [E] <i>N. siamensis</i> (TSC)                                                                  | METLPEN--ETDMGEKSTLDLDSHSEPMIKRSTLRKYIKLCV | VLFIISLVAVALGLGLGLGLKKSVEPQ |
| [E] <i>N. subfulva</i> (BFC)                                                                   | METLPEN--ETDMGEKSTLDLDSHSEPMIKRSTLRKYIKLCV | VLFIISLVAVALGLGLGLGLKKSVEPQ |
| [E] <i>N. sumatrana</i> (ESC)                                                                  | METLPEN--ETDMGEKSTLDLDSHSEPMIKRSTLRKYIKLCV | VLFIISLVAVALGLGLGLGLKKSVEPQ |
| [E] <i>N. mossambica</i> (MSC)                                                                 | METLPEN--ETDMGEKSTLDLDSHSEPMIKRSTLRKYIKLCV | VLFIISLVAVALGLGLGLGLKKSVEPQ |
| [E] <i>N. nubiae</i> (NSC)                                                                     | METLPEN--ETDMGEKSTLDLDSHSEPMIKRSTLRKYIKLCV | VLFIISLVAVALGLGLGLGLKKSVEPQ |
| [Hy] <i>H. curtus</i> (SSS)                                                                    | METLPAD--QTDQGEKSTLELDSHTEIIRKSTLRKYIKLCV  | VLFIISLVAVALGLGLGLGLKKSVEPQ |
| [Hy] <i>H. cyanocinctus</i> (BSS)                                                              | METLPAD--QTDQGEKSTLELDSHTEIIRKSTLRKYIKLCV  | VLFIISLVAVALGLGLGLGLKKSVEPQ |
| <b>PDE-E1a (Conserved in all snake genomes but not expressed in Elapidae and Hydrophiidae)</b> |                                            |                             |
| [P] <i>P. molurus</i> (Python)                                                                 | MIQQK                                      | VLFIISLVVVALGLGLGLGLKKSVEPQ |
| [V] <i>P. flavoviridis</i> (Habu)                                                              | MIQQK                                      | VLFIISLVAVALGLGLGLGLKKSVEPQ |
| [V] <i>B. jararaca</i> (Jararaca)                                                              | MIQQK                                      | VLFIISLVAVALGLGLGLGLKKSVEPQ |
| [V] <i>P. mucrosquamatus</i> (TH)                                                              | MIQQK                                      | VLFIISLVAVALGLGLGLGLKKSVEPQ |
| [V] <i>C. viridis</i> (PR)                                                                     | MIQQK                                      | VLFIISLVAVALGLGLGLGLKKSVEPQ |
| [V] <i>C. tigris</i> (TR)                                                                      | MIQQK                                      | VLFIISLVAVALGLGLGLGLKKSVEPQ |
| [H] <i>H. thanlyinensis</i>                                                                    | MSLPK                                      | VLFIISLVAVALGLGLGLGLKKSVEPQ |
| [H] <i>H. buccata</i> (MWS)                                                                    | MSLPK                                      | VLFIISLVAVALGLGLGLGLKKSVEPQ |
| [C] <i>T. sirtalis</i> (CGS)                                                                   | MSLQK                                      | VLFIISLVAVALGLGLGLGLKKSVEPQ |
| [C] <i>P. guttatus</i> (CS)                                                                    | MSLQK                                      | VLFIISLVAVALGLGLGLGLKKSVEPQ |
| [C] <i>P. catenifer</i> (GS)                                                                   | MSLQK                                      | VLFIISLVAVALGLGLGLGLKKSVEPQ |
| [C] <i>P. obsoletus</i> (WRS)                                                                  | MSLQK                                      | VLFIISLVAVALGLGLGLGLKKSVEPQ |
| [C] <i>T. elegans</i> (WTGS)                                                                   | MSLQK                                      | VLFIISLVAVALGLGLGLGLKKSVEPQ |
| [C] <i>R. subminiatus</i> (RK)                                                                 | MSLQK                                      | VLFIISLVAVALGLGLGLGLKKSVEPQ |
| [C] <i>T. conanti</i>                                                                          | MSLQK                                      | VLFIISLVAVALGLGLGLGLKKSVEPQ |
| [C] <i>T. nigriceps</i> (PBS)                                                                  | MIQQK                                      | VLFIISLVAVALGLGLGLGLKKSVEPQ |
| [D] <i>H. nasicus</i> (WHS)                                                                    | MLKFLRTHPK                                 | VLFIISLVAVALGLGLGLGLKKSVEPQ |
| [L] <i>P. subtaeniatus</i> (WYSS)                                                              | MLKFLRTHPK                                 | VLFIISLVAVALGLGLGLGLKKSVEPQ |
| [L] <i>P. schokari</i> (SSR)                                                                   | MLKFLRTHPK                                 | VLFIISLVAVALGLGLGLGLKKSVEPQ |
| [L] <i>M. monspessulanus</i> (MS)                                                              | MSLQK                                      | VLFIISLVAVALGLGLGLGLKKSVEPQ |
| [E] <i>O. hannah</i> (KC)*                                                                     | MIMQN                                      | VLFIISLVAVALGLGLGLGLKKSVEPQ |
| [E] <i>N. scutatus</i> (MTS)*                                                                  | M--QK                                      | VLFIISLVAVALGLGLGLGLKKSVEPQ |
| [E] <i>L. colubrina</i> (YSK)*                                                                 | MIMQK                                      | VLFIISLVAVALGLGLGLGLKKSVEPQ |
| [E] <i>N. naja</i> (IC)*                                                                       | MVMQK                                      | VLFIISLVAVALGLGLGLGLKKSVEPQ |
| [Hy] <i>H. curtus</i> (SSS)*                                                                   | M--QK                                      | VLFIISLVAVALGLGLGLGLKKSVEPQ |
| [Hy] <i>H. cyanocinctus</i> (BSS)*                                                             | M--QK                                      | VLFIISLVAVALGLGLGLGLKKSVEPQ |
| <b>PDE-E1b (Only found in the genomes and transcriptomes of Elapidae and Hydrophiidae)</b>     |                                            |                             |
| [E] <i>O. hannah</i> (KC)                                                                      | MRCKK                                      | VLFIISLVAVALGLGLGLGLKKSVEPQ |
| [E] <i>N. scutatus</i> (MTS)                                                                   | MRCKK                                      | VLFIISLVAVALGLGLGLGLKKSVEPQ |
| [E] <i>L. colubrina</i> (YSK)                                                                  | MRYYK                                      | VLFIISLVAVALGLGLGLGLKKSVEPQ |
| [E] <i>M. aegyptia</i> (DC)                                                                    | MRCKK                                      | VLFIISLVAVALGLGLGLGLKKSVEPQ |
| [E] <i>H. haemachatus</i> (RH)                                                                 | MRCKK                                      | VLFIISLVAVALGLGLGLGLKKSVEPQ |
| [E] <i>N. annulifera</i> (SC)                                                                  | MRCKK                                      | VLFIISLVAVALGLGLGLGLKKSVEPQ |
| [E] <i>N. atra</i> (CC)                                                                        | MRFKK                                      | VLFIISLVAVALGLGLGLGLKKSVEPQ |
| [E] <i>N. haje</i> (EC)                                                                        | MRCKK                                      | VLFIISLVAVALGLGLGLGLKKSVEPQ |
| [E] <i>N. kaouthia</i> (MC)                                                                    | MRFKK                                      | VLFIISLVAVALGLGLGLGLKKSVEPQ |
| [E] <i>N. naja</i> (IC)                                                                        | MRFKK                                      | VLFIISLVAVALGLGLGLGLKKSVEPQ |
| [E] <i>N. nigricollis</i> (BSC)                                                                | MRCKK                                      | VLFIISLVAVALGLGLGLGLKKSVEPQ |
| [E] <i>N. nivea</i> (Cape Cobra)                                                               | MRCKK                                      | VLFIISLVAVALGLGLGLGLKKSVEPQ |
| [E] <i>N. pallida</i> (RSC)                                                                    | MRCKK                                      | VLFIISLVAVALGLGLGLGLKKSVEPQ |
| [E] <i>N. philippinensis</i> (PSC)                                                             | MRFKK                                      | VLFIISLVAVALGLGLGLGLKKSVEPQ |
| [E] <i>N. siamensis</i> (TSC)                                                                  | MRFKK                                      | VLFIISLVAVALGLGLGLGLKKSVEPQ |
| [E] <i>N. subfulva</i> (BFC)                                                                   | MRCKK                                      | VLFIISLVAVALGLGLGLGLKKSVEPQ |
| [E] <i>N. sumatrana</i> (ESC)                                                                  | MRFKK                                      | VLFIISLVAVALGLGLGLGLKKSVEPQ |
| [E] <i>N. mossambica</i> (MSC)                                                                 | MRCKK                                      | VLFIISLVAVALGLGLGLGLKKSVEPQ |
| [E] <i>N. nubiae</i> (NSC)                                                                     | MRCKK                                      | VLFIISLVAVALGLGLGLGLKKSVEPQ |
| [Hy] <i>H. curtus</i> (SSS)                                                                    | MRCKK                                      | VLFIISLVAVALGLGLGLGLKKSVEPQ |
| [Hy] <i>H. cyanocinctus</i> (BSS)                                                              | MRCKK                                      | VLFIISLVAVALGLGLGLGLKKSVEPQ |

\* Conserved in the genomes but not expressed in the transcriptomes (only selected sequences were shown).

**Abbreviations for the common names:**

Taiwanese habu (TH), Prairie rattlesnake (PR), Terrestrial rattlesnake (TR), Masked water snake (MWS), Common garter snake (CGS), Corn snake (CS), Gopher snake (GS), Western rat snake (WRS), Western terrestrial garter snake (WTGS), Red-necked keelback (RK), Plain black-headed snake (PBS), Western hognose snake (WHS), Western yellow-bellied sand snake (WYSS), Schokari sand racer (SSR), Montpellier snake (MS), King cobra (KC), Mainland tiger snake (MTS), Yellow-lipped sea krait (YSK), India cobra (IC), Desert cobra (DC), Rinkhals (RH), Snouted cobra (SC), Chinese cobra (CC), Egyptian cobra (EC), Monocled cobra (MC), Black-necked spitting cobra (BSC), Red spitting cobra (RSC), Philippine spitting cobra (PSC), Thai spitting cobra (TSC), Brown forest cobra (BFC), Equatorial spitting cobra (ESC), Mozambique spitting cobra (MSC), Nubian spitting cobra (NSC), Shaw's sea snake (SSS), Blue-banded sea snake (BSS).

**Abbreviations for the clades:**

Pythonidae (P), Viperidae (V), Homalopsidae (H), Colubridae (C), Dipsadidae (D), Lamprophiidae (L), Elapidae (E) and Hydrophiidae (Hy).

**Fig. S3 The multiple sequence alignment of the translated peptides around the E1-E2 junction region.** Peptides started from the start codon (ATG, Methionine) of exon 1 to the 5' partial region of exon 2 are shown. The cytoplasmic domains, the transmembrane domains, signal peptides and cleavage sites are colored in green, plum, blue and yellow. Abbreviations are listed in the figure. Only a few species are selected as representatives of Elapidae and Hydrophiidae, whose svPDE-E1a is conserved in genomes but not expressed in the transcriptomes. The ENPP3 transcript of *T. nigriceps* was partially assembled and does not cover the 5' end of the coding sequence.



(A) Putative core promoter of PDE-E1a

|                                   | TATA-Box                                                                                            | Putative initiator |  |
|-----------------------------------|-----------------------------------------------------------------------------------------------------|--------------------|--|
| [P] <i>P. molurus</i> (Python)    | TTTGTAAA-----GCAGAACGACGTTATCTGGAAATGAGAGTAAAGGAGTACCTATCTGATAAAATATCTCTAAAATACATCTCTTTCTAGG        |                    |  |
| [V] <i>P. flavoviridis</i> (Habu) | TCTCTGGCA-----GTAAAAATATATATTTTGGAGAGGGAAGAAAAATGAGAAACTATTTGATAAAACACCTCTAACATGCATCTGCCTTTAGG      |                    |  |
| [V] <i>B. jararaca</i> (Jararaca) | TCTCTGTCATTTGGTAAAGTAAAAATATATATTTTGGAGAGGGAAGAAAAatgataaaCTATTTGATAAAACACCTCTAACATGCATCTGCCTTTAGG  |                    |  |
| [V] <i>P. mucrosquamatus</i> (TH) | TCTCTGGCA-----GTAAAAATATATATTTTGGAGAGGGAAGAAAAATGAGAAACTATTTGATAAAACACCTCTAACATGCATCTGCCTTTAGG      |                    |  |
| [V] <i>C. viridis</i> (PR)        | TCTCTGGCAATTTGGTAAAGTAAAAATATATATTTTGGAGAGGGAAGAAAAATGAGAAACTATTTGATAAAACACCTCTAACATGCATCTGCCTTTAGG |                    |  |
| [V] <i>C. tigris</i> (TR)         | TCTCTGGCAATTTGGTAAAGTAAAAATATATATTTTGGAGAGGGAAGAAAAATGAGAAACTATTTGATAAAACACCTCTAACATGCATCTGCCTTTAGG |                    |  |
| [H] <i>M. thanlyinensis</i>       | TCTCTGGCAATTTGGTAAAGTAAAAATATATATTTTGGAGAGGGAAGAAAAATGAGAAACTATTTGATAAAACACCTCTAACATGCATCTGCCTTTAGG |                    |  |
| [C] <i>T. sirtalis</i> (CGS)      | TCTCTGGCAATTTGGTAAAGTAAAAATATATATTTTGGAGAGGGAAGAAAAATGAGAAACTATTTGATAAAACACCTCTAACATGCATCTGCCTTTAGG |                    |  |
| [C] <i>P. guttatus</i> (CS)       | TCTCTGGCAATTTGGTAAAGTAAAAATATATATTTTGGAGAGGGAAGAAAAATGAGAAACTATTTGATAAAACACCTCTAACATGCATCTGCCTTTAGG |                    |  |
| [C] <i>P. catenifer</i> (SSR)     | TCTCTGGCAATTTGGTAAAGTAAAAATATATATTTTGGAGAGGGAAGAAAAATGAGAAACTATTTGATAAAACACCTCTAACATGCATCTGCCTTTAGG |                    |  |
| [C] <i>P. obsoletus</i> (WRS)     | TCTCTGGCAATTTGGTAAAGTAAAAATATATATTTTGGAGAGGGAAGAAAAATGAGAAACTATTTGATAAAACACCTCTAACATGCATCTGCCTTTAGG |                    |  |
| [C] <i>T. elegans</i> (WTGS)      | TCTCTGGCAATTTGGTAAAGTAAAAATATATATTTTGGAGAGGGAAGAAAAATGAGAAACTATTTGATAAAACACCTCTAACATGCATCTGCCTTTAGG |                    |  |
| [E] <i>O. hannah</i> (KC)         | TCTCTGGCAATTTGGTAAAGTAAAAATATATATTTTGGAGAGGGAAGAAAAATGAGAAACTATTTGATAAAACACCTCTAACATGCATCTGCCTTTAGG |                    |  |
| [E] <i>P. textilis</i> (EBS)      | TCTCTGGCAATTTGGTAAAGTAAAAATATATATTTTGGAGAGGGAAGAAAAATGAGAAACTATTTGATAAAACACCTCTAACATGCATCTGCCTTTAGG |                    |  |
| [E] <i>N. scutatus</i> (MTS)      | TCTCTGGCAATTTGGTAAAGTAAAAATATATATTTTGGAGAGGGAAGAAAAATGAGAAACTATTTGATAAAACACCTCTAACATGCATCTGCCTTTAGG |                    |  |
| [E] <i>N. naja</i> (IC)           | TCTCTGGCAATTTGGTAAAGTAAAAATATATATTTTGGAGAGGGAAGAAAAATGAGAAACTATTTGATAAAACACCTCTAACATGCATCTGCCTTTAGG |                    |  |
| [Hy] <i>H. curtus</i> (SSS)       | TCTCTGGCAATTTGGTAAAGTAAAAATATATATTTTGGAGAGGGAAGAAAAATGAGAAACTATTTGATAAAACACCTCTAACATGCATCTGCCTTTAGG |                    |  |
| [Hy] <i>H. cyanocinctus</i> (BSS) | TCTCTGGCAATTTGGTAAAGTAAAAATATATATTTTGGAGAGGGAAGAAAAATGAGAAACTATTTGATAAAACACCTCTAACATGCATCTGCCTTTAGG |                    |  |

(B) Alternative translation start sites recruited by 3' elongation of PDE-E1a in Dipsadidae and Lamprophiidae

|                                   | PDE-E1a                                                                                                                                | E2               |
|-----------------------------------|----------------------------------------------------------------------------------------------------------------------------------------|------------------|
| [P] <i>P. molurus</i> (Python)    | GCAACAAGAGTGGAGAGATGACCCAGCAGAAG-----                                                                                                  | GTCTCTTTTCATTTTC |
| [V] <i>P. flavoviridis</i> (Habu) | GGAACCCAGAGTGGAGAGATGATTCAGCAGAAG-----                                                                                                 | GTCTCTTTTCATTTTC |
| [V] <i>P. mucrosquamatus</i> (TH) | GGAACCCAGAGTGGAGAGATGATTCAGCAGAAG-----                                                                                                 | GTCTCTTTTCATTTTC |
| [V] <i>C. viridis</i> (PR)        | GGAACCCAGAGTGGAGAGATGATTCAGCAGAAG-----                                                                                                 | GTCTCTTTTCATTTTC |
| [V] <i>C. tigris</i> (TR)         | GGAACCCAGAGTGGAGAGATGATTCAGCAGAAG-----                                                                                                 | GTCTCTTTTCATTTTC |
| [H] <i>M. thanlyinensis</i>       | GGAACA--GCGGAGAGATGAGTCTGCCAAG-----                                                                                                    | GTCTCTTTTCATTTTC |
| [H] <i>H. buccata</i> (MWS)       | GGAACA--GCTGAGAGATGATTCGCCAAG-----                                                                                                     | GTCTCTTTTCATTTTC |
| [C] <i>T. sirtalis</i> (CGS)      | GAAACCCAGAGTGGAGAGATGAGTCTGCAGAAG-----                                                                                                 | GTCTCTTTTCATTTTC |
| [C] <i>P. guttatus</i> (CS)       | GGAACCCAGAGTGGAGAGATGAGTCTGCAGAAG-----                                                                                                 | GTCTCTTTTCATTTTC |
| [C] <i>T. conanti</i> (MK)        | GAAACCCAGAGTGGAGAGATGAGTCTGCAGAAG-----                                                                                                 | GTCTCTTTTCATTTTC |
| [C] <i>T. nigriceps</i> (PBS)     | GGAACCCAGAGTGGAGAGATGATTCAGCAGAAG-----                                                                                                 | GTCTCTTTTCATTTTC |
| [D] <i>C. lineatus</i>            | GGAACCCAGAGTGGAGAGATGAGTCTGCAGAAGTAAAGGCATAGATACCCAGGATAGGAAATGGGACCAAAAGATCTGGATCCCGACCATGCTAAATTTCTGAAGGACTCATCCAAAAGTCTCTTTTCATTTTC | GTCTCTTTTCATTTTC |
| [L] <i>P. subtaeniatus</i> (WYSS) | GGAACCCAGAGTGGAGAGATGAGTCTGCAGAAGTAAAGGCATAGATACCCAGGATAGGAAATGGGACCAAAAGATCTGGATCCCGACCATGCTAAAGTTCTTAAGGACTCATCCAAAAGTCTCTTTTCATTTTC | GTCTCTTTTCATTTTC |
| [L] <i>P. schokari</i> (SSR)      | GGAACCCAGAGTGGAGAGATGAGTCTGCAGAAGTAAAGGCATAGATACCCAGGATAGGAAATGGGACCAAAAGATCTGGATCCCGACCATGCTAAAGTTCTTAAGGACTCATCCAAAAGTCTCTTTTCATTTTC | GTCTCTTTTCATTTTC |
| [L] <i>M. monspessulanus</i> (MS) | GGAACCCAGAGTGGAGAGATGAGTCTGCAGAAG-----                                                                                                 | GTCTCTTTTCATTTTC |
| [E] <i>O. hannah</i> (KC)         | GGAACA--GTGGAGAGATGATTAATGCAGAAT-----                                                                                                  | GTCTCTTTTCATTTTC |
| [E] <i>N. naja</i> (IC)           | GGAACA--GTGGAGAGATGATTAATGCAGAAG-----                                                                                                  | GTCTCTTTTCATTTTC |
| [E] <i>N. scutatus</i> (MTS)      | GGAACA--ATG-----CAGAAG-----                                                                                                            | GTCTCTTTTCATTTTC |
| [E] <i>L. colubrina</i> (YSK)     | GGAACA--ATGGAGAGATGATTAATGCAGAAG-----                                                                                                  | GTCTCTTTTCATTTTC |
| [Hy] <i>H. curtus</i> (SSS)       | GGAACA--ATG-----CAGAAG-----                                                                                                            | GTCTCTTTTCATTTTC |
| [Hy] <i>H. cyanocinctus</i> (BSS) | GGAACA--ATG-----CAGAAG-----                                                                                                            | GTCTCTTTTCATTTTC |

(C) Putative core promoter of PDE-E1b

|                                   | TATA-Box                                                                                            | Putative initiator | DPE (Downstream promoter element) |
|-----------------------------------|-----------------------------------------------------------------------------------------------------|--------------------|-----------------------------------|
| [E] <i>O. hannah</i> (KC)         | GAAGATTTGATATTTAGAAAGAGTGCATCTTATGGTCAAAAAATTTAACTTGTITTTTTT-----AAAGGATACCTGTTTCTTAAAGAACTTTAAAG   |                    |                                   |
| [E] <i>P. textilis</i> (EBS)      | GAAGATTTGATATAAC--AAAGAGTGCATCTTGTGG--CAAAAAATCTAACTTGTITTTTTT-----AAAGGATACCTGTTTCTTAAAGAACTTTAAAG |                    |                                   |
| [E] <i>N. scutatus</i> (MTS)      | GAAGATTTGATATAAC--AAAGAGTGCATCTTGTGGCCAAAAATTTAACTTGTITTTTTT-----AAAGGATACCTGTTTCTTAAAGAACTTTAAAG   |                    |                                   |
| [E] <i>L. colubrina</i> (YSK)     | TGTGATTTGATATAAC--AAAGAGTGCATCTTGTGGCCAAAAATCTCAACTTGTITTTTTT-----AAAGGATACCTGTTTCTTAAAGAACTTTAAAG  |                    |                                   |
| [E] <i>N. naja</i> (IC)           | GAAGATTTAAATAAC--AAAGAGTGCATCTTGTGGCCAAAAATTTAACTTGTITTTTTT-----AAAGGATACCTGTTTCTTAAAGAACTTTAAAG    |                    |                                   |
| [Hy] <i>H. curtus</i> (SSS)       | GAAGATTTGAAATAAC--AAAGAGTGCATCTTGTGGCCAAAAATTTAACTTGTITTTTTT-----AAAGGATATTTGTTTCTTAAAGAACTTTAAAG   |                    |                                   |
| [Hy] <i>H. cyanocinctus</i> (BSS) | GAAGATTTGAAATAAC--AAAGAGTGCATCTTGTGGCCAAAAATTTAACTTGTITTTTTT-----AAAGGATATTTGTTTCTTAAAGAACTTTAAAG   |                    |                                   |
| [CSME] <i>P. textilis</i> (EBS)   | GAAGACTTAGCATAAT--AAAGAGTGCATCTCAGT-----AAACTCAACTTGTITTTTTTAAAAAAC--CTTGTTCCTT-----GAAATTGCATG     |                    |                                   |
| [CSME] <i>L. colubrina</i> (YSK)  | GAAGACTTAGCATAAT--AAAGAGTGCATCTCAGT-----AAACTCAACTTGTITTTTTTAAAAAACCTTGTTCCTT-----GAAATTGCATG       |                    |                                   |
| [CSME] <i>H. curtus</i> (SSS)     | GAAGACTTAGCATAAT--AAAGAGTGCATCTCAGT-----AAACTCAACTTGTITTTTTTAAAAAAC--CTTGTTCCTT-----GAAATTGCATG     |                    |                                   |

Homologous region in the consensus sequence of mobile element DR0148352

Abbreviations

TH: Taiwanese habu, PR: Prairie rattlesnake, TR: Terrestrial rattlesnake, CGS: Common garter snake, CS: Corn snake, GS: Gopher snake, WRS: Western rat snake, WTGS: Western terrestrial garter snake, MK: Milk snake, PBS: Plain black-headed snake, WYSS: Western yellow-bellied sand snake, SSR: Schokari sand racer, MS: Montpellier snake, KC: King cobra, EBS: Eastern brown snake, MTS: Mainland tiger snake, YSK: Yellow-lipped sea krait, IC: India cobra, SSS: Shaw's sea snake and BSS: Blue-banded sea snake. P: Pythonidae, V: Viperidae, H: Homalopsidae, C: Colubridae, E: Elapidae, Hy: Hydrophiidae and CSME: Consensus sequence of mobile element DR0148352.

**Fig. S4 The multiple sequence alignment of the putative core promoters located on the upstream of (A) svPDE-E1a and (B) svPDE-E1b.** Putative functional motifs are highlighted with corresponding colors. Abbreviations of clades and species common names are the same as Supplementary fig. S3 with an additional one, CSME, as the consensus sequence of mobile element (DR0148352).

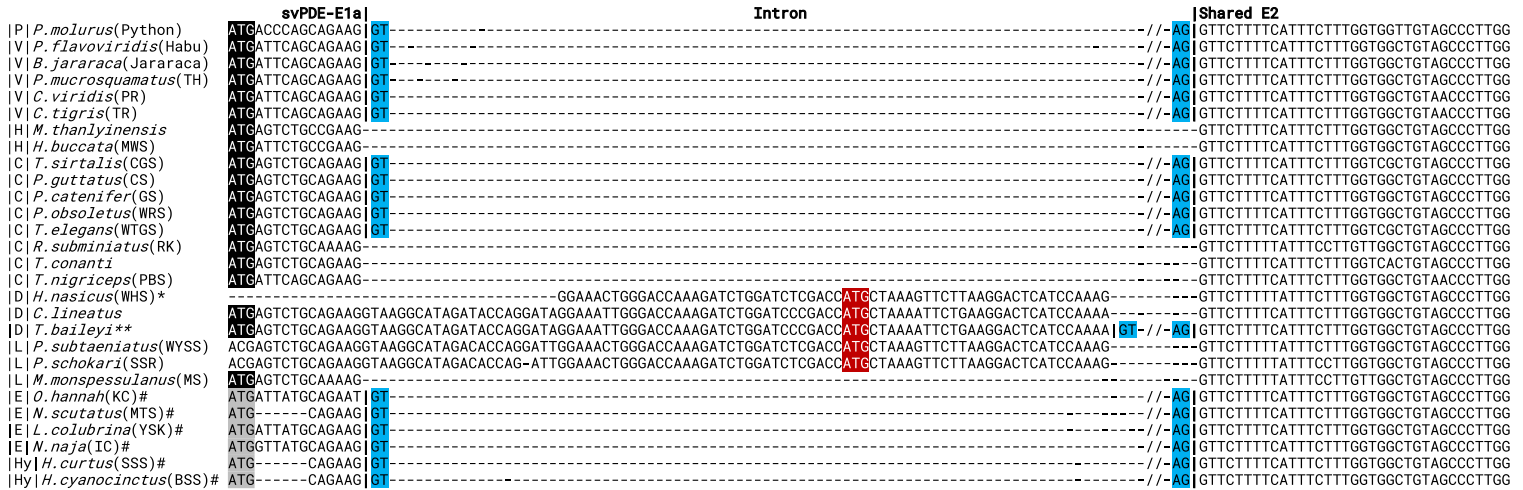

\* Missing of 5' end during sequencing was probably due to the nature of poly-A library preparation.  
 \*\* The most closely related species to *C. lineatus* with available genome.  
 # These sequences are conserved in the genomes but not expressed in the transcriptomes.

**Abbreviations for the common names:**

Taiwanese habu (TH), Prairie rattlesnake (PR), Terrestrial rattlesnake (TR), Masked water snake (MWS), Common garter snake (CGS), Corn snake (CS), Gopher snake (GS), Western rat snake (WRS), Western terrestrial garter snake (WTGS), Red-necked keelback (RK), Plain black-headed snake (PBS), Western hognose snake (WHS), Western yellow-bellied sand snake (WYSS), Schokari sand racer (SSR), Montpellier snake (MS), King cobra (KC), Mainland tiger snake (MTS), Yellow-flipped sea krait (YSK), India cobra (IC), Shaw's sea snake (SSS), Blue-banded sea snake (BSS), Philippine spitting cobra (PSC).

**Abbreviations for the clades:**

Pythonidae (P), Viperidae (V), Homalopsidae (H), Colubridae (C), Dipsadidae (D), Lamprophiidae (L), Elapidae (E) and Hydrophiidae (Hy).

**Fig. S5 The multiple sequence alignment of the coding regions of svPDE-E1a and 5' partial E2.** Conserved start codons of svPDE-E1a are highlighted in black and gray, corresponding to the expressed and non-expressed transcripts, respectively. For all species with available genomes, the interval sequences between svPDE-E1a and conserved E2 are canonical GT-AG introns, which are shown in the alignments with splicing sites highlighted in blue. Other regions of intron sequences are omitted for a clear view. For species that only have transcriptomic data, the sequences shown in the alignment were obtained from the assembled transcripts. In Dipsadidae and Lamprophiidae, the alternative start codons located on the elongated svPDE-1a due to using alternative 3' splicing sites are highlighted in red.

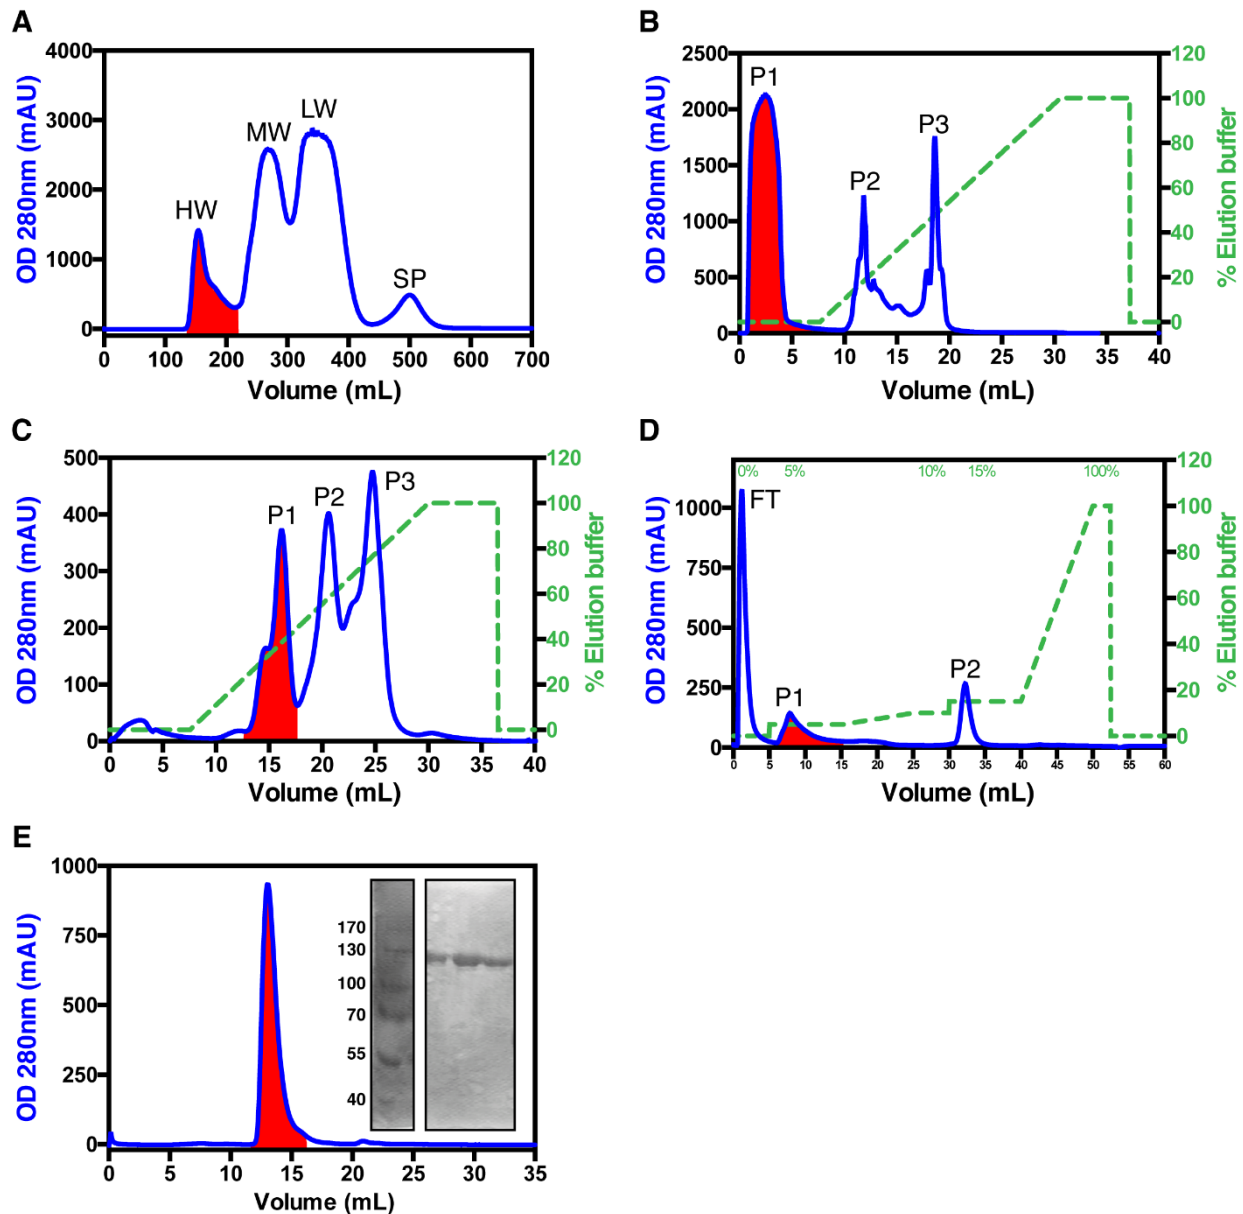

**Fig. S6 Purification of svPDE from the crude venom of *Naja atra* habitated in Taiwan.** SvPDE purification was performed using (A) Sephadex G-75 followed by (B) MonoQ, (C) Hitrap Heparin, (D) MonoS, and (E) Superdex 200 columns. Red-highlighted fractions contained svPDE. (A) At first, size exclusion chromatography separated the crude venom into four fractions: high (HW), medium (MW), and low molecular weight proteins (LW), and small peptides (SP), in which svPDE with a molecular weight of ~100k Da appeared in the HW, the first fraction of the elution. (B) Secondly, anion-exchange chromatography with a MonoQ column captured negatively charged proteins, leaving svPDE in P1, the flow-through fraction. (C) The next affinity chromatography (HiTrap Heparin) and (D) cation-exchange chromatography (MonoS) further separated svPDE from other high molecular weight venom components. (E) Lastly, the ultra-pure svPDE was acquired after the Superdex 200 column. The purity of svPDE analyzed by SDS-PAGE under reducing conditions is shown in the inset of the figure (see Fig. S6 source data for original uncropped image). The svPDE purified from *Naja atra* venom was estimated to be about 0.1-0.2% of crude venom.

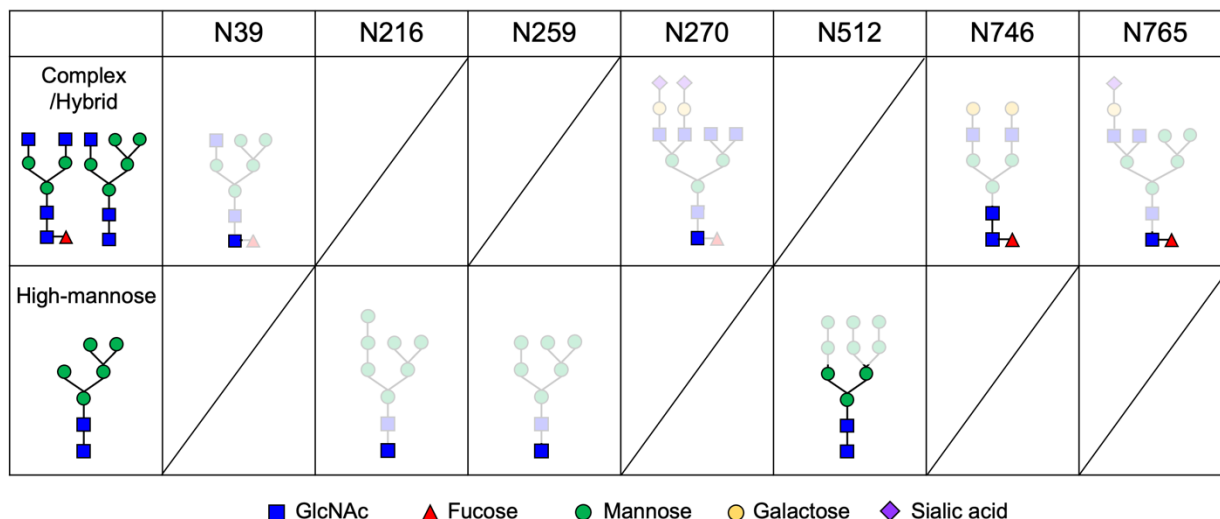

**Fig. S7 Identification of N-glycosylated sites and N-glycan patterns of svPDE from *Naja atra* based on electron density distributions from X-ray diffraction data and mass spectrometric methods.** The most complete composition of the major form at each site is depicted in the table. Glycan residues observed in crystal structures are highlighted in dark colors and those depicted as light colors were only observed according to the mass spectrometric data. Four glycans (N39, N270, N746 and N765) were fucosylated and three glycans (N216, N259 and N512) adopted high mannose structures.

The raw data can be retrieved from the following links:

<https://docs.google.com/spreadsheets/d/1kEU9ofVK0J1lopM55m4a1Rd7PgSMlbu/edit?usp=sharing&oid=114353426449521939124&rtpof=true&sd=true>

<https://docs.google.com/spreadsheets/d/145r7S9KRE62ZrqPVcfWQODdY532WbhDf/edit?usp=sharing&oid=114353426449521939124&rtpof=true&sd=true>

<https://docs.google.com/spreadsheets/d/1vM9Va4xntFPiTlZ9YDFV2RHe4EQjT3-/edit?usp=sharing&oid=114353426449521939124&rtpof=true&sd=true>

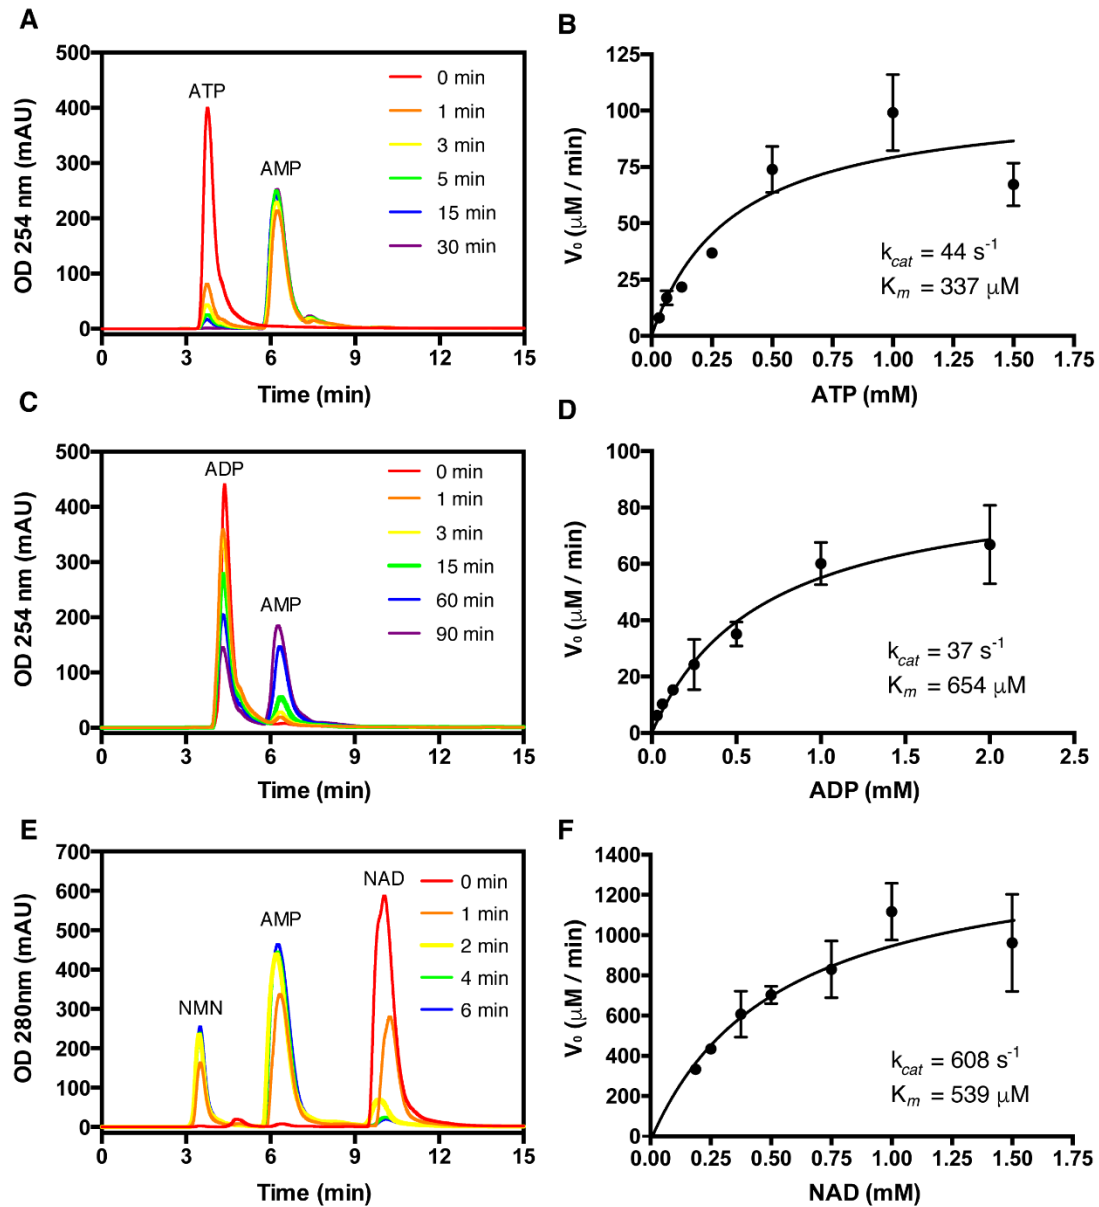

**Fig. S8 Nucleotide and NAD-hydrolysis activities of svPDE from *Naja atra*.** (A) HPLC analysis of 40 nM svPDE incubated with 1 mM ATP for 0, 1, 3, 5, 15 and 30 min (AU: absorbance unit). (B) Michaelis-Menten plot of the hydrolysis of ATP by 40 nM svPDE. (C) HPLC analysis of 40 nM svPDE incubated with 1 mM ADP for 0, 1, 3, 5, 15, 60 and 90 min. (D) Michaelis-Menten plot of the hydrolysis of ADP by 40 nM svPDE. (E) HPLC analysis of 80 nM svPDE incubated with 1 mM NAD for 0, 1, 2, 4 and 6 min. (F) Michaelis-Menten plot of the hydrolysis of NAD by 80 nM svPDE (NMN: nicotinamide mononucleotide).



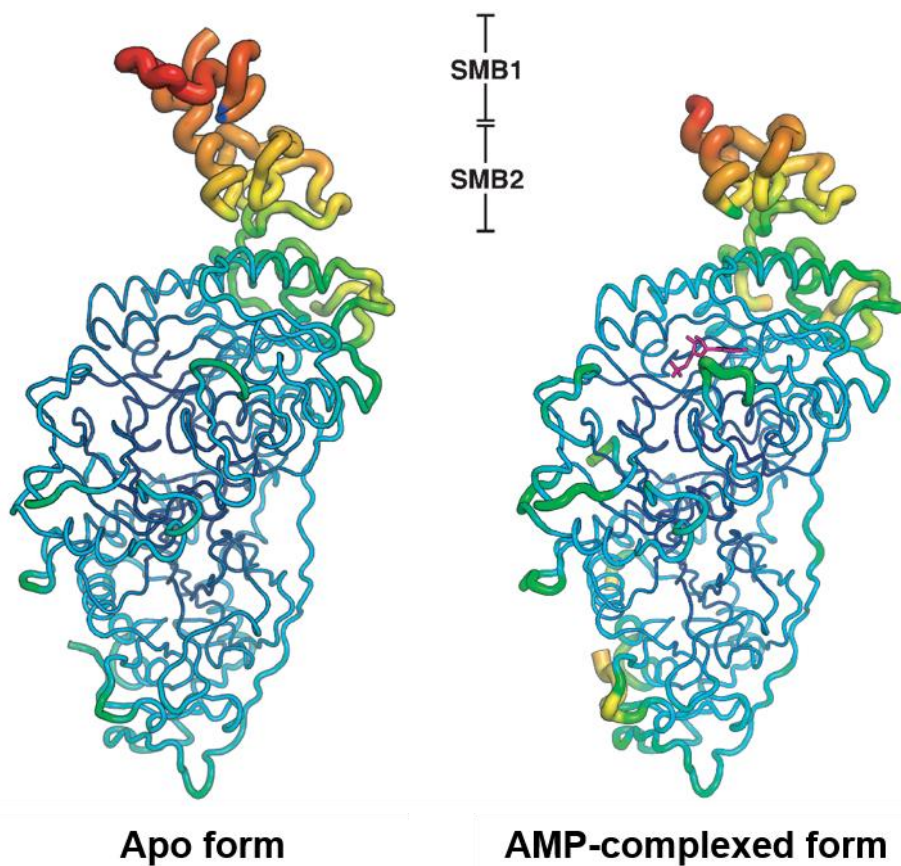

**Fig. S9 Putty (sausage) representation of the crystal structures of svPDE from *Naja atra*.** The radii of the backbone structures are proportional to the averaged B-factors of the individual residues (or the  $C_{\alpha}$  atoms), which are color-ramped from blue to red for low to high B-factors.

**Table S1 Summary of genomic and transcriptomic data used in this study**

| Family        | NCBI accession  | Data type | Scientific name                   | Common name               | Source Tissue for RNA-Seq      |
|---------------|-----------------|-----------|-----------------------------------|---------------------------|--------------------------------|
| Shinisauridae | GCA_021292165.1 | Genome    | <i>Shinisaurus crocodilurus</i>   | Chinese crocodile lizard  |                                |
| Shinisauridae | SRR14583706     | RNA-Seq   | <i>Shinisaurus crocodilurus</i>   | Chinese crocodile lizard  | Mixture                        |
| Varanidae     | GCF_004798865.1 | Genome    | <i>Varanus komodoensis</i>        | Komodo dragon             |                                |
| Varanidae     | SRR8466822      | RNA-Seq   | <i>Varanus komodoensis</i>        | Komodo dragon             | blood                          |
| Varanidae     | SRR8466824      | RNA-Seq   | <i>Varanus komodoensis</i>        | Komodo dragon             | blood                          |
| Varanidae     | SRR8466825      | RNA-Seq   | <i>Varanus komodoensis</i>        | Komodo dragon             | blood                          |
| Varanidae     | SRR8466826      | RNA-Seq   | <i>Varanus komodoensis</i>        | Komodo dragon             | blood                          |
| Varanidae     | SRR8466827      | RNA-Seq   | <i>Varanus komodoensis</i>        | Komodo dragon             | blood                          |
| Varanidae     | SRR8735151      | RNA-Seq   | <i>Varanus komodoensis</i>        | Komodo dragon             | Heart                          |
| Varanidae     | SRR8735152      | RNA-Seq   | <i>Varanus komodoensis</i>        | Komodo dragon             | Heart                          |
| Agamidae      | GCF_900067755.1 | Genome    | <i>Pogona vitticeps</i>           | Central bearded dragon    |                                |
| Agamidae      | SRR14455628     | RNA-Seq   | <i>Pogona vitticeps</i>           | Central bearded dragon    | Epithelium from dental tissues |
| Agamidae      | SRR14455629     | RNA-Seq   | <i>Pogona vitticeps</i>           | Central bearded dragon    | Epithelium from dental tissues |
| Agamidae      | SRR14455630     | RNA-Seq   | <i>Pogona vitticeps</i>           | Central bearded dragon    | Epithelium from dental tissues |
| Agamidae      | SRR14455631     | RNA-Seq   | <i>Pogona vitticeps</i>           | Central bearded dragon    | Mesenchyme from dental tissues |
| Agamidae      | SRR14455632     | RNA-Seq   | <i>Pogona vitticeps</i>           | Central bearded dragon    | Mesenchyme from dental tissues |
| Agamidae      | SRR14455633     | RNA-Seq   | <i>Pogona vitticeps</i>           | Central bearded dragon    | Mesenchyme from dental tissues |
| Agamidae      | SRR14455634     | RNA-Seq   | <i>Pogona vitticeps</i>           | Central bearded dragon    | Epithelium from dental tissues |
| Agamidae      | SRR14455635     | RNA-Seq   | <i>Pogona vitticeps</i>           | Central bearded dragon    | Epithelium from dental tissues |
| Agamidae      | SRR14455636     | RNA-Seq   | <i>Pogona vitticeps</i>           | Central bearded dragon    | Epithelium from dental tissues |
| Agamidae      | SRR14455637     | RNA-Seq   | <i>Pogona vitticeps</i>           | Central bearded dragon    | Mesenchyme from dental tissues |
| Agamidae      | SRR14455638     | RNA-Seq   | <i>Pogona vitticeps</i>           | Central bearded dragon    | Mesenchyme from dental tissues |
| Agamidae      | SRR14455639     | RNA-Seq   | <i>Pogona vitticeps</i>           | Central bearded dragon    | Mesenchyme from dental tissues |
| Dactyloidae   | GCF_000090745.1 | Genome    | <i>Anolis carolinensis</i>        | Green anole               |                                |
| Dactyloidae   | SRR495265       | RNA-Seq   | <i>Anolis carolinensis</i>        | Green anole               | Adrenal Gland                  |
| Dactyloidae   | SRR495266       | RNA-Seq   | <i>Anolis carolinensis</i>        | Green anole               | Adrenal Gland                  |
| Dactyloidae   | SRR495267       | RNA-Seq   | <i>Anolis carolinensis</i>        | Green anole               | Adrenal Gland                  |
| Dactyloidae   | SRR492481       | RNA-Seq   | <i>Anolis carolinensis</i>        | Green anole               | Adrenal Gland                  |
| Dactyloidae   | SRR492482       | RNA-Seq   | <i>Anolis carolinensis</i>        | Green anole               | Adrenal Gland                  |
| Typhlopidae   | GCA_022379055.1 | Genome    | <i>Anilius bituberculatus</i>     | Prong-snouted blind snake |                                |
| Typhlopidae   | SRR15431541     | RNA-Seq   | unclassified <i>Madatyphlops</i>  |                           | Mixture                        |
| Pythonidae    | GCF_000186305.1 | Genome    | <i>Python bivittatus</i>          | Burmese python            |                                |
| Pythonidae    | SRR11149661     | RNA-Seq   | <i>Python molurus</i>             | Pythons                   | Spleen                         |
| Pythonidae    | SRR11149662     | RNA-Seq   | <i>Python molurus</i>             | Pythons                   | Skeletal muscle                |
| Pythonidae    | SRR11149663     | RNA-Seq   | <i>Python molurus</i>             | Pythons                   | Brain                          |
| Pythonidae    | SRR11149664     | RNA-Seq   | <i>Python molurus</i>             | Pythons                   | Ovary                          |
| Pythonidae    | SRR11149665     | RNA-Seq   | <i>Python molurus</i>             | Pythons                   | Testis                         |
| Viperidae     | GCA_003402635.1 | Genome    | <i>Protobothrops flavoviridis</i> | Habu                      |                                |
| Viperidae     | DRR125541       | RNA-Seq   | <i>Protobothrops flavoviridis</i> | Habu                      | Fang forming tissue            |
| Viperidae     | DRR125542       | RNA-Seq   | <i>Protobothrops flavoviridis</i> | Habu                      | Venom gland                    |
| Viperidae     | DRR125543       | RNA-Seq   | <i>Protobothrops flavoviridis</i> | Habu                      | Pit organ                      |
| Viperidae     | DRR125544       | RNA-Seq   | <i>Protobothrops flavoviridis</i> | Habu                      | Nose                           |
| Viperidae     | DRR125545       | RNA-Seq   | <i>Protobothrops flavoviridis</i> | Habu                      | Brain                          |
| Viperidae     | DRR125546       | RNA-Seq   | <i>Protobothrops flavoviridis</i> | Habu                      | Eye                            |
| Viperidae     | DRR125547       | RNA-Seq   | <i>Protobothrops flavoviridis</i> | Habu                      | Fetal fibroblast               |
| Viperidae     | DRR125548       | RNA-Seq   | <i>Protobothrops flavoviridis</i> | Habu                      | Venom gland                    |
| Viperidae     | DRR125549       | RNA-Seq   | <i>Protobothrops flavoviridis</i> | Habu                      | Brain                          |
| Viperidae     | DRR125550       | RNA-Seq   | <i>Protobothrops flavoviridis</i> | Habu                      | Spleen                         |
| Viperidae     | DRR125551       | RNA-Seq   | <i>Protobothrops flavoviridis</i> | Habu                      | Lung                           |
| Viperidae     | DRR125552       | RNA-Seq   | <i>Protobothrops flavoviridis</i> | Habu                      | Liver                          |
| Viperidae     | DRR125553       | RNA-Seq   | <i>Protobothrops flavoviridis</i> | Habu                      | Kidney                         |
| Viperidae     | DRR125554       | RNA-Seq   | <i>Protobothrops flavoviridis</i> | Habu                      | Pancreas                       |
| Viperidae     | DRR125555       | RNA-Seq   | <i>Protobothrops flavoviridis</i> | Habu                      | Small Intestine                |
| Viperidae     | DRR125556       | RNA-Seq   | <i>Protobothrops flavoviridis</i> | Habu                      | Colon                          |
| Viperidae     | DRR125557       | RNA-Seq   | <i>Protobothrops flavoviridis</i> | Habu                      | Stomach                        |
| Viperidae     | DRR125558       | RNA-Seq   | <i>Protobothrops flavoviridis</i> | Habu                      | Heart                          |
| Viperidae     | DRR125559       | RNA-Seq   | <i>Protobothrops flavoviridis</i> | Habu                      | Ovary                          |
| Viperidae     | DRR125560       | RNA-Seq   | <i>Protobothrops flavoviridis</i> | Habu                      | Masseter muscle                |
| Viperidae     | GCA_018340635.1 | Genome    | <i>Bothrops jararaca</i>          | Jararaca                  |                                |
| Viperidae     | GCF_001527695.2 | Genome    | <i>Protobothrops</i>              | Taiwanese habu            |                                |
| Viperidae     | GCA_003400415.2 | Genome    | <i>Crotalus viridis</i>           | Prairie rattlesnake       |                                |
| Viperidae     | SRR7401978      | RNA-Seq   | <i>Crotalus viridis</i>           | Prairie rattlesnake       | Liver                          |

|              |                 |         |                                                                      |                                  |                       |
|--------------|-----------------|---------|----------------------------------------------------------------------|----------------------------------|-----------------------|
| Viperidae    | SRR7401979      | RNA-Seq | <i>Crotalus viridis</i>                                              | Prairie rattlesnake              | Liver                 |
| Viperidae    | SRR7401980      | RNA-Seq | <i>Crotalus viridis</i>                                              | Prairie rattlesnake              | Kidney                |
| Viperidae    | SRR7401981      | RNA-Seq | <i>Crotalus viridis</i>                                              | Prairie rattlesnake              | Kidney                |
| Viperidae    | SRR7401982      | RNA-Seq | <i>Crotalus viridis</i>                                              | Prairie rattlesnake              | Liver                 |
| Viperidae    | SRR7401983      | RNA-Seq | <i>Crotalus viridis</i>                                              | Prairie rattlesnake              | Liver                 |
| Viperidae    | SRR7401984      | RNA-Seq | <i>Crotalus viridis</i>                                              | Prairie rattlesnake              | Kidney                |
| Viperidae    | SRR7401985      | RNA-Seq | <i>Crotalus viridis</i>                                              | Prairie rattlesnake              | Kidney                |
| Viperidae    | SRR7401986      | RNA-Seq | <i>Crotalus viridis</i>                                              | Prairie rattlesnake              | Pancreas              |
| Viperidae    | SRR7401987      | RNA-Seq | <i>Crotalus viridis</i>                                              | Prairie rattlesnake              | Tongue                |
| Viperidae    | SRR7401988      | RNA-Seq | <i>Crotalus viridis</i>                                              | Prairie rattlesnake              | Lung                  |
| Viperidae    | SRR7401989      | RNA-Seq | <i>Crotalus viridis</i>                                              | Prairie rattlesnake              | Venom gland           |
| Viperidae    | SRR7401990      | RNA-Seq | <i>Crotalus viridis</i>                                              | Prairie rattlesnake              | Accessory venom gland |
| Viperidae    | SRR7401991      | RNA-Seq | <i>Crotalus viridis</i>                                              | Prairie rattlesnake              | Testis                |
| Viperidae    | SRR7401992      | RNA-Seq | <i>Crotalus viridis</i>                                              | Prairie rattlesnake              | Pancreas              |
| Viperidae    | SRR7401993      | RNA-Seq | <i>Crotalus viridis</i>                                              | Prairie rattlesnake              | Shaker muscle         |
| Viperidae    | SRR7401994      | RNA-Seq | <i>Crotalus viridis</i>                                              | Prairie rattlesnake              | Stomach               |
| Viperidae    | SRR7401995      | RNA-Seq | <i>Crotalus viridis</i>                                              | Prairie rattlesnake              | Brain                 |
| Viperidae    | SRR7401996      | RNA-Seq | <i>Crotalus viridis</i>                                              | Prairie rattlesnake              | Rictal gland          |
| Viperidae    | SRR7401997      | RNA-Seq | <i>Crotalus viridis</i>                                              | Prairie rattlesnake              | Ovary                 |
| Viperidae    | SRR7401998      | RNA-Seq | <i>Crotalus viridis</i>                                              | Prairie rattlesnake              | Spleen                |
| Viperidae    | SRR7401999      | RNA-Seq | <i>Crotalus viridis</i>                                              | Prairie rattlesnake              | Blood                 |
| Viperidae    | SRR7402000      | RNA-Seq | <i>Crotalus viridis</i>                                              | Prairie rattlesnake              | Liver                 |
| Viperidae    | SRR7402001      | RNA-Seq | <i>Crotalus viridis</i>                                              | Prairie rattlesnake              | Kidney                |
| Viperidae    | SRR7402002      | RNA-Seq | <i>Crotalus viridis</i>                                              | Prairie rattlesnake              | Kidney                |
| Viperidae    | SRR7402003      | RNA-Seq | <i>Crotalus viridis</i>                                              | Prairie rattlesnake              | Kidney                |
| Viperidae    | SRR7402004      | RNA-Seq | <i>Crotalus viridis</i>                                              | Prairie rattlesnake              | Venom gland           |
| Viperidae    | SRR7402005      | RNA-Seq | <i>Crotalus viridis</i>                                              | Prairie rattlesnake              | Venom gland           |
| Viperidae    | SRR7402006      | RNA-Seq | <i>Crotalus viridis</i>                                              | Prairie rattlesnake              | Liver                 |
| Viperidae    | SRR7402007      | RNA-Seq | <i>Crotalus viridis</i>                                              | Prairie rattlesnake              | Liver                 |
| Viperidae    | SRR7402008      | RNA-Seq | <i>Crotalus viridis</i>                                              | Prairie rattlesnake              | Skin                  |
| Viperidae    | SRR7402009      | RNA-Seq | <i>Crotalus viridis</i>                                              | Prairie rattlesnake              | Pancreas              |
| Viperidae    | GCF_016545835.1 | Genome  | <i>Crotalus tigris</i>                                               | Tiger rattlesnake                |                       |
| Homalopsidae | GCA_017656035.1 | Genome  | <i>Myanophis thanlyinensis</i>                                       |                                  |                       |
| Homalopsidae | SRR12802475     | RNA-Seq | <i>Homalopsis buccata</i>                                            | Masked water snake               | Venom gland           |
| Colubridae   | GCF_001077635.1 | Genome  | <i>Thamnophis sirtalis</i>                                           | Common garter snake              |                       |
| Colubridae   | SRR12915662     | RNA-Seq | <i>Thamnophis conanti</i>                                            |                                  | Duvernoy's gland      |
| Colubridae   | SRR1292619      | RNA-Seq | <i>Boiga irregularis</i>                                             |                                  | Duvernoy's gland      |
| Colubridae   | SRR14319402     | RNA-Seq | <i>Tantilla nigriceps</i>                                            | Plain black-headed snake         | Duvernoy's gland      |
| Colubridae   | SRR14319403     | RNA-Seq | <i>Tantilla nigriceps</i>                                            | Plain black-headed snake         | Duvernoy's gland      |
| Colubridae   | SRR14319404     | RNA-Seq | <i>Tantilla nigriceps</i>                                            | Plain black-headed snake         | Duvernoy's gland      |
| Colubridae   | SRR14319405     | RNA-Seq | <i>Tantilla nigriceps</i>                                            | Plain black-headed snake         | Duvernoy's gland      |
| Colubridae   | SRR14319406     | RNA-Seq | <i>Tantilla nigriceps</i>                                            | Plain black-headed snake         | Duvernoy's gland      |
| Colubridae   | SRR14319407     | RNA-Seq | <i>Tantilla nigriceps</i>                                            | Plain black-headed snake         | Duvernoy's gland      |
| Colubridae   | GCF_001185365.1 | Genome  | <i>Pantherophis guttatus</i>                                         | Corn snake                       |                       |
| Colubridae   | SRR9596700      | RNA-Seq | <i>Pantherophis guttatus</i>                                         | Corn snake                       | Brain                 |
| Colubridae   | SRR9596701      | RNA-Seq | <i>Pantherophis guttatus</i>                                         | Corn snake                       | Brain                 |
| Colubridae   | SRR9596706      | RNA-Seq | <i>Pantherophis guttatus</i>                                         | Corn snake                       | Heart                 |
| Colubridae   | SRR9596707      | RNA-Seq | <i>Pantherophis guttatus</i>                                         | Corn snake                       | Liver                 |
| Colubridae   | SRR9596708      | RNA-Seq | <i>Pantherophis guttatus</i>                                         | Corn snake                       | Dorsal skin           |
| Colubridae   | SRR9596709      | RNA-Seq | <i>Pantherophis guttatus</i>                                         | Corn snake                       | Ventral skin          |
| Colubridae   | SRR9596710      | RNA-Seq | <i>Pantherophis guttatus</i>                                         | Corn snake                       | Vomer nasal Organ     |
| Colubridae   | SRR9596711      | RNA-Seq | <i>Pantherophis guttatus</i>                                         | Corn snake                       | Vomer nasal Organ     |
| Colubridae   | SRR9596712      | RNA-Seq | <i>Pantherophis guttatus</i>                                         | Corn snake                       | Cerebellum            |
| Colubridae   | SRR9596713      | RNA-Seq | <i>Pantherophis guttatus</i>                                         | Corn snake                       | Testis                |
| Colubridae   | SRR9596714      | RNA-Seq | <i>Pantherophis guttatus</i>                                         | Corn snake                       | Ovary                 |
| Colubridae   | SRR9596715      | RNA-Seq | <i>Pantherophis guttatus</i>                                         | Corn snake                       | Liver                 |
| Colubridae   | SRR9596716      | RNA-Seq | <i>Pantherophis guttatus</i>                                         | Corn snake                       | Kidney                |
| Colubridae   | SRR9596717      | RNA-Seq | <i>Pantherophis guttatus</i>                                         | Corn snake                       | Cerebellum            |
| Colubridae   | GCA_019677565.1 | Genome  | <i>Pituophis catenifer</i>                                           | Copher snake                     |                       |
| Colubridae   | GCA_012654085.1 | Genome  | <i>Pantherophis obsoletus</i>                                        | Western rat snake                |                       |
| Colubridae   | GCF_009769535.1 | Genome  | <i>Thamnophis elegans</i>                                            | Western terrestrial garter snake |                       |
| Colubridae   | SRR12802480     | RNA-Seq | <i>Rhabdophis subminiatus</i>                                        | Red-necked keelback              | Duvernoy's gland      |
| Dipsadidae   | GCA_003457575.1 | Genome  | <i>Thermophis baileyi</i><br>(Closed species to <i>C. lineatus</i> ) |                                  | Duvernoy's gland      |
| Dipsadidae   | SRR14319401     | RNA-Seq | <i>Conopsis lineatus</i>                                             |                                  | Duvernoy's gland      |
| Dipsadidae   | SRR12802479     | RNA-Seq | <i>Heterodon nasicus</i>                                             | Western hognose snake            | Duvernoy's gland      |

|              |                 |         |                                |                             |                  |
|--------------|-----------------|---------|--------------------------------|-----------------------------|------------------|
| Dipsadidae   | SRR12802481     | RNA-Seq | <i>Helicops leopardinus</i>    |                             | Duvernoy's gland |
| Dipsadidae   | SRR1292610      | RNA-Seq | <i>Hypsiglena</i>              |                             | Duvernoy's gland |
| Lamprophiida | SRR12802476     | RNA-Seq | <i>Psammophis subtaeniatus</i> | Western yellow-bellied sand | Venom gland      |
| Lamprophiida | SRR12802477     | RNA-Seq | <i>Psammophis schokari</i>     | Schokari sand racer         | Venom gland      |
| Lamprophiida | SRR12802478     | RNA-Seq | <i>Malpolon monspessulanus</i> | Montpellier snake           | Venom gland      |
| Elapidae     | GCA_000516915.1 | Genome  | <i>Ophiophagus hannah</i>      | King cobra                  |                  |
| Elapidae     | GCA_015471245.1 | Genome  | <i>Laticauda colubrina</i>     | Yellow-lipped sea krait     |                  |
| Elapidae     | GCF_900518725.1 | Genome  | <i>Notechis scutatus</i>       | Mainland tiger snake        |                  |
| Elapidae     | SRR8206942      | RNA-Seq | <i>Naja haje</i>               | Egyptian cobra              | Venom gland      |
| Elapidae     | GCA_009733165.1 | Genome  | <i>Naja naja</i>               | Indian cobra                |                  |
| Elapidae     | SRR8206943      | RNA-Seq | <i>Naja naja</i>               | Indian cobra                | Venom gland      |
| Elapidae     | SRR8206944      | RNA-Seq | <i>Naja kaouthia</i>           | Monocled cobra              | Venom gland      |
| Elapidae     | SRR11050878     | RNA-Seq | <i>Naja siamensis</i>          | Thai spitting cobra         | Venom gland      |
| Elapidae     | SRR11050880     | RNA-Seq | <i>Naja nubiae</i>             | Nubian spitting cobra       | Venom gland      |
| Elapidae     | SRR11050881     | RNA-Seq | <i>Naja nivea</i>              | Cape cobra                  | Venom gland      |
| Elapidae     | This study      | Genome  | <i>Naja atra</i>               | Chinese cobra               | Muscle           |
| Elapidae     | SRR11050884     | RNA-Seq | <i>Naja atra</i>               | Chinese cobra               | Venom gland      |
| Elapidae     | SRR11050887     | RNA-Seq | <i>Naja sumatrana</i>          | Equatorial spitting cobra   | Venom gland      |
| Elapidae     | SRR11050889     | RNA-Seq | <i>Hemachatus haemachatus</i>  | Rinkhals                    | Venom gland      |
| Elapidae     | SRR11050890     | RNA-Seq | <i>Naja philippinensis</i>     | Philippine spitting cobra   | Venom gland      |
| Elapidae     | SRR11050879     | RNA-Seq | <i>Naja pallida</i>            | Red spitting cobra          | Venom gland      |
| Elapidae     | SRR11050882     | RNA-Seq | <i>Naja nigricollis</i>        | Black-necked spitting cobra | Venom gland      |
| Elapidae     | SRR11050883     | RNA-Seq | <i>Naja mossambica</i>         | Mozambique spitting cobra   | Venom gland      |
| Elapidae     | SRR11050885     | RNA-Seq | <i>Naja annulifera</i>         | Snouted cobra               | Venom gland      |
| Elapidae     | SRR11050886     | RNA-Seq | <i>Walterinnesia aegyptia</i>  | Desert cobra                | Venom gland      |
| Elapidae     | SRR11050888     | RNA-Seq | <i>Naja subfulva</i>           | Brown forest cobra          | Venom gland      |
| Hydrophiidae | GCA_019472885.1 | Genome  | <i>Hydrophis curtus</i>        | Shaw's sea snake            |                  |
| Hydrophiidae | SRR11659669     | RNA-Seq | <i>Hydrophis curtus</i>        | Shaw's sea snake            | Venom gland      |
| Hydrophiidae | SRR11659670     | RNA-Seq | <i>Hydrophis curtus</i>        | Shaw's sea snake            | Venom gland      |
| Hydrophiidae | SRR11659671     | RNA-Seq | <i>Hydrophis curtus</i>        | Shaw's sea snake            | Venom gland      |
| Hydrophiidae | GCA_019473425.1 | Genome  | <i>Hydrophis cyanocinctus</i>  | Blue-banded sea snake       |                  |
| Hydrophiidae | SRR11659657     | RNA-Seq | <i>Hydrophis cyanocinctus</i>  | Blue-banded sea snake       | Venom gland      |
| Hydrophiidae | SRR11659658     | RNA-Seq | <i>Hydrophis cyanocinctus</i>  | Blue-banded sea snake       | Venom gland      |
| Hydrophiidae | SRR11659659     | RNA-Seq | <i>Hydrophis cyanocinctus</i>  | Blue-banded sea snake       | Venom gland      |

**Table S2 Crystallographic and refinement statistics**

|                                                     | <i>Naja atra</i> svPDE<br>apo form (unliganded)<br>PDB accession: 5GZ4 | <i>Naja atra</i> svPDE<br>AMP-complexed form (liganded)<br>PDB accession: 5GZ5 |
|-----------------------------------------------------|------------------------------------------------------------------------|--------------------------------------------------------------------------------|
| <b>Data collection</b>                              |                                                                        |                                                                                |
| Wavelength (Å)                                      | 0.97                                                                   | 1.00                                                                           |
| Space group                                         | P21212                                                                 | P21212                                                                         |
| Cell dimensions                                     |                                                                        |                                                                                |
| <i>a, b, c</i> (Å)                                  | 171.679, 65.876, 89.615                                                | 171.207, 65.612, 88.675                                                        |
| $\alpha, \beta, \gamma$ (°)                         | 90, 90, 90                                                             | 90, 90, 90                                                                     |
| Resolution (Å)                                      | 30 - 2.55 (2.64 – 2.55)*                                               | 30 - 2.09 (2.18 – 2.09)                                                        |
| <i>R</i> <sub>merge</sub>                           | 0.111 (0.560)                                                          | 0.059 (0.570)                                                                  |
| CC <sub>1/2</sub>                                   | 0.92 (0.723)                                                           | 0.945 (0.785)                                                                  |
| <i>I</i> / $\sigma$ <i>I</i>                        | 13.1 (2.0)                                                             | 22.5 (2.5)                                                                     |
| Completeness (%)                                    | 99.8 (99.8)                                                            | 99.1 (98.9)                                                                    |
| Redundancy                                          | 4.5 (4.7)                                                              | 4.8 (4.9)                                                                      |
| <b>Refinement</b>                                   |                                                                        |                                                                                |
| Resolution (Å)                                      | 29.43 - 2.55 (2.64 – 2.55)                                             | 27.88 - 2.09 (2.16 – 2.09)                                                     |
| No. of reflections                                  | 33351                                                                  | 58940                                                                          |
| <i>R</i> <sub>work</sub> / <i>R</i> <sub>free</sub> | 0.241/0.289                                                            | 0.181/0.217                                                                    |
| No. atoms                                           |                                                                        |                                                                                |
| Protein                                             | 6450                                                                   | 6255                                                                           |
| Ligand/ion                                          | 162                                                                    | 157                                                                            |
| Water                                               | 677                                                                    | 804                                                                            |
| B-factors                                           |                                                                        |                                                                                |
| Protein                                             | 49.39                                                                  | 37.91                                                                          |
| Ligand/ion                                          | 52.42                                                                  | 56.27                                                                          |
| Water                                               | 40.52                                                                  | 42.23                                                                          |
| R.m.s deviations                                    |                                                                        |                                                                                |
| Bond lengths (Å)                                    | 0.010                                                                  | 0.012                                                                          |
| Bond angles (°)                                     | 1.78                                                                   | 1.52                                                                           |
| <b>Validation (MolProbity<sup>1</sup>)</b>          |                                                                        |                                                                                |
| Ramachandran favored (%)                            | 94.00                                                                  | 96.00                                                                          |
| Ramachandran outliers (%)                           | 0.88                                                                   | 0.26                                                                           |

\* Highest resolution shell is shown in parenthesis.

1. Chen, V.B., et al., *MolProbity: all-atom structure validation for macromolecular crystallography*. Acta Crystallogr D Biol Crystallogr, 2010.

66(Pt 1): p. 12-21.



**Table S3 Direct biochemical measurement of the substrate specificity**

| Protein            | svPDE <sup>1</sup>            | svPDE <sup>2</sup>             | ENPP3 <sup>3</sup>  | ENPP1 <sup>4</sup>  |                  |
|--------------------|-------------------------------|--------------------------------|---------------------|---------------------|------------------|
| Species            | <i>Naja atra</i>              | <i>Trimeresurus stejnegeri</i> | <i>Homo sapiens</i> | <i>Homo sapiens</i> |                  |
| Reaction Condition | 37°C, pH8                     | 37°C, pH7.4                    | 37°C, pH7.5         | NA                  |                  |
| ATP                | $K_m$ ( $\mu\text{M}$ )       | 336.0                          | $360 \pm 0.01$      | $61.50 \pm 6.40$    | $144.5 \pm 36.0$ |
|                    | $k_{cat}$ ( $\text{s}^{-1}$ ) | 44.0                           | $2.68 \pm 0.13$     | $1.52 \pm 0.41$     | $7.8 \pm 0.8$    |
| ADP                | $K_m$ ( $\mu\text{M}$ )       | 654.0                          | $91 \pm 0.005$      | NA                  | NA               |
|                    | $k_{cat}$ ( $\text{s}^{-1}$ ) | 37.0                           | $0.23 \pm 0.01$     | NA                  | NA               |
| NAD                | $K_m$ ( $\mu\text{M}$ )       | 539.0                          | $240 \pm 0.01$      | NA                  | NA               |
|                    | $k_{cat}$ ( $\text{s}^{-1}$ ) | 608.0                          | $0.82 \pm 0.03$     | NA                  | NA               |
| GTP                | $K_m$ ( $\mu\text{M}$ )       | 2160.0                         | NA                  | $123.70 \pm 6.60$   | NA               |
|                    | $k_{cat}$ ( $\text{s}^{-1}$ ) | 717.9                          | NA                  | $3.37 \pm 0.31$     | NA               |
| CTP                | $K_m$ ( $\mu\text{M}$ )       | 5750.0                         | NA                  | $120.30 \pm 10.50$  | NA               |
|                    | $k_{cat}$ ( $\text{s}^{-1}$ ) | 1502.0                         | NA                  | $6.36 \pm 0.30$     | NA               |
| UTP                | $K_m$ ( $\mu\text{M}$ )       | 2730.0                         | NA                  | $120.20 \pm 26.80$  | NA               |
|                    | $k_{cat}$ ( $\text{s}^{-1}$ ) | 684.6                          | NA                  | $9.14 \pm 0.68$     | NA               |

\* This study.

- Peng, L., et al., *Purification and partial characterization of a novel phosphodiesterase from the venom of Trimeresurus stejnegeri: inhibition of platelet aggregation*. Biochimie, 2011. **93**(9): p. 1601-9.
- Gorelik, A., et al., *Structural basis for nucleotide recognition by the ectoenzyme CD203c*. FEBS J, 2018. **285**(13): p. 2481-2494.
- Albright, R.A., et al., *Molecular basis of purinergic signal metabolism by ectonucleotide pyrophosphatase/phosphodiesterases 4 and 1 and implications in stroke*. J Biol Chem, 2014. **289**(6): p. 3294-306.

**Table S4 Statistics of PacBio CCS reads**

| Library ID           | Total pass bases (bp) | Total pass reads (#) | Mean length of pass reads (bp) | Max. length of pass reads (bp) | N50 length of pass reads (bp) | % reads >10Kb | % reads >20Kb |
|----------------------|-----------------------|----------------------|--------------------------------|--------------------------------|-------------------------------|---------------|---------------|
| m64144_201215_090635 | 29,676,086,054        | 2,375,903            | 12,490                         | 39,549                         | 12,666                        | 87.91         | 0.50          |
| m64144_201216_153226 | 26,959,253,579        | 2,187,719            | 12,322                         | 36,670                         | 12,481                        | 86.49         | 0.45          |
| Total                | 56,635,339,633        | 4,563,622            | 12,410                         | 39,549                         | 12,578                        | 87.23         | 0.48          |

**Table S5 Statistics of Illumina paired-end reads**

| Total reads | Clean reads | Total bases (bp) | Clean bases (bp) | Q20 (%) | Q30 (%) | GC (%) |
|-------------|-------------|------------------|------------------|---------|---------|--------|
| 568,048,858 | 559,566,268 | 85,207,328,700   | 78,096,046,566   | 97.37   | 92.63   | 41.10  |

**Table S6 Statistics of draft assembly**

| Statistics   | De novo assembly of PacBio reads |               | Assembly polished with Illumina reads |               |
|--------------|----------------------------------|---------------|---------------------------------------|---------------|
|              | Contig Length(bp)                | Contig Number | Contig Length(bp)                     | Contig Number |
| N50          | 29,710,036                       | 18            | 29,709,188                            | 18            |
| N60          | 20,075,995                       | 26            | 20,074,295                            | 26            |
| N70          | 10,560,158                       | 38            | 10,559,546                            | 38            |
| N80          | 4,204,041                        | 65            | 4,203,549                             | 65            |
| N90          | 1,530,490                        | 140           | 1,530,247                             | 140           |
| Longest      | 111,070,803                      | 1             | 111,070,038                           | 1             |
| <b>Total</b> | 1,879,633,414                    | 847           | 1,879,550,836                         | 847           |
